# Supplementary material for: Super-enhancer-driven TOX2 mediates oncogenesis in Natural Killer/T Cell Lymphoma
Source: PubMed Central journal article supplement (PMC10084643; doi:10.1186/s12943-023-01767-1), 2023-04-10
Supplement: 12943_2023_1767_MOESM1_ESM.pdf [file 12943_2023_1767_MOESM1_ESM.pdf]

## SUPPLEMENTAL INFORMATION

### Super-enhancer-driven TOX2 mediates oncogenesis in Natural Killer/T Cell Lymphoma

#### Supplemental Methods and Materials

##### RNA extraction and real-time quantitative PCR analysis

Total RNA was extracted using the miRNeasy Mini Kit (Qiagen GmbH, Germany) protocol with the DNaseI treatment included. A reverse transcription (RT) reaction was carried out by using the High Capacity cDNA Reverse Transcription Kit system (Thermo Fisher Scientific, MA, USA). Real-time fluorescence monitoring of the PCR products was assayed with SYBR green (Thermo Fisher Scientific) with the 7500 Fast Real-Time PCR (RT-PCR) System (Thermo Fisher Scientific). Relative gene expression levels were calculated using  $2^{(-\Delta\Delta CT)}$  by comparing the amount of endogenous *GAPDH* in the same sample. All the primer details were listed in supplemental Table S3.

##### Lentiviral infection

Lentiviral supernatants were produced by co-transfection of scramble shRNA or TOX2-shRNAs or RUNX3-shRNAs together with packaging plasmids into 293T cells. Three million of HANK1 or NKYS cells were mixed with concentrated viral supernatant and 8  $\mu$ g/ml of polybrene (Millipore) and centrifuged at 2500 rpm for 90 min at 30°C. After additional incubation at 37°C for 4 hours, the medium was changed to fresh complete medium. Three days later, cells were submitted for RNA and protein extraction, followed by qRT-PCR and Western blot analysis of TOX2 or RUNX3. Primers were listed in supplemental Table S3.

##### RNA-seq data processing

The RNA-seq data were checked for raw sequence quality using FastQC v0.11.5, and were filtered to remove adaptor sequences, contamination and low quality read. The sequences were mapped to human genome hg38 using STAR v2.4.2a and subsequently, transcript quantification using RSEM 1.2.25 with Gencode v24 annotation. EBseq v1.20.0 was used to identify differentially expressed genes. T-test was computed by Matlab® R2012a, statistics toolbox version 8.0 (MathWorks; Natick, MA).

##### Chromatin immunoprecipitation (ChIP)-PCR

ChIP was performed using SimpleChIP<sup>®</sup> kit according to the manufacturer's instruction (Cell Signalling Technology, USA). Briefly, NKYS and HANK1 cells were crosslinked in 1%

formaldehyde for 10 minutes. The cross-linking reaction was stopped by the addition of Glycine for 5 minutes. After washing and lysis, samples were digested using micrococcal nuclease and sonicated on ice to an average size of 150 - 900 bp and centrifuged for 10 min at 10 000 *g* at 4°C to remove insoluble material. 2% of this solution was saved (input chromatin) and processed with the eluted immunoprecipitates beginning with the cross-link reversal step. Samples were incubated overnight at 4°C with anti-RUNX3 antibody (sc-376591 X, Santa Cruz Biotechnology, TX, USA) or isotype matched control IgG (negative control) with rotation. Immune complexes were collected by incubating samples with protein G magnetic beads for 2 hrs at 4°C with rotation. The beads were pelleted by brief centrifugation and washed as per the manufacturer's instructions. The immunocomplexes were eluted from the magnetic beads by elution buffer. Input and immunoprecipitated chromatin were incubated with elution buffer at 65°C for 2 hours to reverse DNA–protein cross-links. The immunoprecipitated DNA was purified as per the manufacturer's instructions (Merck, Millipore, USA) and analysed by qPCR. Fold enrichment method was used to calculate the increase in specific signal (anti-RUNX3 antibody) over back ground noise (IgG control antibody). The values were then normalized to the values of IgG control, which was defined as 1. The ChIP-PCR primers amplifying specific TOX2-SE regions containing RUNX3 binding motifs were included in supplemental Table S6.

## Supplemental tables

**Supplemental Table S1. Characteristics of NKTL cell lines and culture conditions.**

| Cell lines | Sex | Age | Ethnicity | Original description of disease | CD56 | EBV | Cytokine dependency | Culture conditions                     |
|------------|-----|-----|-----------|---------------------------------|------|-----|---------------------|----------------------------------------|
| NK-92      | M   | 50  | Caucasian | ANKL                            | +    | +   | IL-2                | RPMI-1640 medium, 10% FBS              |
| NK-S1      | M   | 58  | Chinese   | NKTL                            | -    | +   | -                   | DMEM medium, 10% FBS, 10% equine serum |
| NK-YS      | F   | 19  | Japanese  | NKTL                            | +    | +   | IL-2                | RPMI-1640 medium, 10% FBS              |
| HANK-1     | F   | 46  | Japanese  | NKTL                            | +    | +   | IL-2                | Artemis medium-2, 2% human serum       |

ANKL, aggressive NK-cell leukemia FBS: fetal bovine serum

**Supplemental Table S2. The clinicopathological characteristics of these 3 NKTL patients.**

| <b>UPN</b> | <b>Sex</b> | <b>Age</b> | <b>Race</b> | <b>Ann Arbor stage</b> | <b>IHC markers for diagnosis</b>                                                                                                       | <b>EBV DNA copies/ml plasma</b> |
|------------|------------|------------|-------------|------------------------|----------------------------------------------------------------------------------------------------------------------------------------|---------------------------------|
| NKTL9      | M          | 25         | Emirati     | IV                     | CD30+, CD2+, CD3+, TiA1+, GranzymeB+, EBER+, CD56+, Ki67 90-100%, CD10+, CD20+, CD21+, CD5-, CD8-, TDT-, CD4-                          | 288                             |
| NKTL10     | M          | 56         | Chinese     | IV                     | CD2+, CD43+, CD8+, TiA1+, EBER+, TCRbeta+, Ki67 ~40%, CD3-, CD5-, CD7-, CD4-, CD30-, TCRgamma-, CD56-, ALKinase-, CD20-, PAX5-, CD79a- | 127, 160                        |
| NKTL4      | M          | 51         | Chinese     | IIIE                   | CD3+ CD56+, GranzymeB+, EBER+, CD138+, Ki67 <10%, TiA1+ CD2+, CD4+, Lyn+, Lck+, TDT-, CD5-, CD20-, CD8-, CD7-                          | N.A.                            |

**Supplemental Table S3. The list of primers and shRNA and their sequences.**

| <b>Name</b>            | <b>Sequences</b>                                       |
|------------------------|--------------------------------------------------------|
| TOX2-shRNA1            | AGCAAAGAAGGAATATCTGAA                                  |
| TOX2-shRNA2            | ACTTTCGGTGACGTGTCCAAA                                  |
| RUNX3-shRNA1           | GGCTAGCAGCATGCGGTATTT                                  |
| RUNX3-shRNA1           | ACCTCGGAACTGAACCCATTC                                  |
| <b>qRT-PCR</b>         |                                                        |
| TOX2-Forward           | 5'-CTCAGGAAGAGGAGTCGGAAGT-3'                           |
| TOX2-Reverse           | 5'-ACACAGGCTTCTGCGGCTCATT-3'                           |
| RUNX3-Forward          | 5'-ATGACGAGAACTACTCCG-3'                               |
| RUNX3-Reverse          | 5'-TCAGGGTGAACTCTTCC-3'                                |
| EOMES-Forward          | 5'-AAATGGGTGACCTGTGGCAAAGC-3'                          |
| EOMES-Reverse          | 5'-CTCCTGTCTCATCCAGTGGGAA-3'                           |
| TBX21-Forward          | 5'-ATTGCCGTGACTGCCTACCAGA-3'                           |
| TBX21-Reverse          | 5'-GGAATTGACAGTTGGGTCCAGG-3'                           |
| ID2-Forward            | 5'-GGCGAGTGCGGATAAAAGC-3'                              |
| ID2-Reverse            | 5'-CTAACGGACCTCACGGGACT-3'                             |
| CD150-Forward          | 5'-AGGCCCTCCACGTTATCTA-3'                              |
| CD150-Reverse          | 5'-GCAAAAGCGCTGAACTGA-3'                               |
| CD244-Forward          | 5'-CTGCTTCTGTGTGTGGAGGA-3'                             |
| CD244-Reverse          | 5'-AGCAGAAGACTGGGACTGGA-3'                             |
| ITGB7-Forward          | 5'-GAATCAACCAGACGGTGACTTTCT-3'                         |
| ITGB7-Reverse          | 5'-GCCCCGAGCCTCAGGA-3'                                 |
| GAPDH-Forward          | 5'-GTATTGGGCGCCTGGTCAC-3'                              |
| GAPDH-Reverse          | 5'-CTCCTGGAAGATGGTGATGG-3'                             |
| <b>PCR for TOX2-SE</b> | KpnI sequence: <b>GGTACC</b> ; NheI sequence: GCTAGC   |
| TOX2-eNC-F             | 5'-TTAGCAG <b>GTACC</b> GGATAACCCAGAACATAAAAC-3'       |
| TOX2-eNC-R             | 5'-TGCTTAG <b>GCTAGC</b> ACCTCAATGAACACTGGTTTGC-3'     |
| TOX2-e1-F              | 5'-TTAGCAG <b>GTACC</b> ATTCGTATAGTCAGACATGAGT-3'      |
| TOX2-e1-R              | 5'-TGCTTAG <b>GCTAGC</b> CCATTTAAAATCCTTGGACGGCC-3'    |
| TOX2-e2-F              | 5'- TTAGCAG <b>GTACC</b> GCAGGATGGATGCTCAGAAGTC-3'     |
| TOX2-e2-R              | 5' – TGCTTAG <b>GCTAGC</b> ATGAATGAATGAATGATCCTGAGC-3' |
| TOX2-e3-F              | 5'-TTAGCAG <b>GTACC</b> AATCAGTCCTAGCACTTTGGGAG-3'     |
| TOX2-e3-R              | 5'- TGCTTAG <b>GCTAGC</b> CCTAAAGCTCACGCTTATAACAGC-3'  |

| <b>Mutant RUNX3 binding site</b> | <b>Site-direct mutagenesis primer sequences</b>                                                                      |
|----------------------------------|----------------------------------------------------------------------------------------------------------------------|
| MUT-RUNX3-E1                     | 5'-CATATCTGAGCATATCCCT <b>AACGTC</b> ACTCAGCAGCAGCACC-3'<br>5'-GGTGCTGCTGCTGAGT <b>GACGTT</b> AGGGATATGCTCAGATATG-3' |
| MUT-RUNX3-E2                     | 5'- CGGCCTTATCTGATGCT <b>AACGTTG</b> GGGAGCCAGCGAG-3'<br>5'- CTCGCTGGCTCCCC <b>AACGTT</b> AGCATCAGATAAGGCCG-3'       |
| MUT-RUNX3-E3                     | 5'-CGTCGGGTTGCACTGT <b>AACGTG</b> GGGGGAACGAGTG-3'<br>5'-CACTCGTTCCCC <b>CACGTT</b> ACAGTGCAACCCGACG-3'              |
| <b>TOX2 ChIP-PCR</b>             | <b>Primers sequences</b>                                                                                             |
| P1 (-188 to +33)                 | Forward: 5'-GCACAGGAGCCAAGGTCAGT-3'<br>Reverse: 5'-TGGAGGGCTCGGGACGCGCG-3'                                           |
| P2 (+14 to +168)                 | Forward: 5'-TCGTGCCGGCGCCGCCCGGA-3'<br>Reverse: 5'-AGCCGTGCCCGGAGCGGGC-3'                                            |
| P3 (-864 to -629)                | Forward: 5'-GGTGGATGGGTGGAAAAGCA-3'<br>Reverse: 5'-CTTATGGGTCAGCCGTTTCCT-3'                                          |

**Supplemental Table S4. The list of SE-genes, RNA-seq overexpression genes and their common genes.**

| <b>SE-associated genes</b> | <b>Overexpression genes by RNA-seq</b> | <b>Common genes</b> |
|----------------------------|----------------------------------------|---------------------|
| EOMES                      | BCORP1                                 | ITPK1               |
| RUNX2                      | NLGN4Y                                 | SIGLEC9             |
| TBX21                      | RPS4Y1                                 | SLC8A1              |
| ADSS                       | EIF1AY                                 | CST7                |
| ANKRD28                    | KDM5D                                  | WNT8B               |
| ANTXR2                     | TXLNG2P                                | DUSP4               |
| APMAP                      | UTY                                    | RBPJ                |
| ARHGAP18                   | DDX3Y                                  | DNMT3B              |
| ARHGAP30                   | PRKY                                   | EXOC2               |
| ARID1A                     | ZFY                                    | RGL1                |
| ARRB1                      | USP9Y                                  | PHLDA1              |
| AUTS2                      | TTTY15                                 | NCAM1               |
| BCAT1                      | KLRC1                                  | GPR171              |
| C15orf39                   | MT-RNR2                                | HIST1H2BJ           |
| C19orf54                   | RP4-742C19.12                          | SPRY2               |
| CADM1                      | KIR2DL4                                | KIF14               |
| CCL5                       | KRT81                                  | GFI1                |
| CD3E                       | GZMAP1                                 | SH2D2A              |
| CDC7                       | TRDJ1                                  | KLRC1               |
| CENPF                      | MT-RNR1                                | MAGOHB              |
| CEP55                      | CCL13                                  | TBX21               |
| CEP57L1                    | NCAM1                                  | RASSF4              |
| CERS6                      | CTSW                                   | MTHFD1              |
| CHN2                       | NMUR1                                  | PXN                 |
| CHSY1                      | GDF6                                   | ATP8B4              |
| CKAP2L                     | SLC4A10                                | BVES                |
| CLDND2                     | CCL3                                   | RAB20               |
| CMC1                       | KLRC2                                  | CHN2                |
| COLGALT2                   | KRT86                                  | FCGR3A              |
| COMMD7                     | APOBEC3H                               | EAF1                |
| CRIM1                      | UBBP4                                  | PRF1                |

|           |               |           |
|-----------|---------------|-----------|
| CST7      | XCL2          | CMKLR1    |
| CTSC      | TRDC          | PDE4D     |
| CXCR3     | RP11-291B21.2 | YPEL1     |
| DENND1B   | SH2D1B        | RASGEF1A  |
| DFFA      | ITGAD         | SLC19A1   |
| DKC1      | CD163         | EOMES     |
| DLGAP5    | KLRD1         | SLC5A3    |
| DMXL2     | NCR1          | HIST1H2AG |
| DOK2      | RNF157        | TPST2     |
| DPP4      | AC021218.2    | STK39     |
| DPYSL2    | GZMB          | KIF23     |
| DRAM1     | FCGR1B        | GPLY      |
| DUSP4     | MRC1          | COL4A2    |
| EGF1      | GZMA          | GRAMD1B   |
| ECI2      | FCGR3A        | GATA3     |
| ETFB      | CXCL9         | PTGER2    |
| EXOC2     | RP4-738P11.4  | ITGAD     |
| F2R       | MSR1          | DMXL2     |
| FAM102B   | SLC22A20      | MS4A4A    |
| FASLG     | FASLG         | SNX18     |
| FCGR3A    | MLC1          | CXCR3     |
| FHL3      | KLRC3         | TMPRSS3   |
| GAS7      | SLC27A2       | CEP55     |
| GATA3     | NKG7          | F2R       |
| GFI1      | MATK          | GZMB      |
| GLUL      | RP4-738P11.3  | C15orf39  |
| GPR65     | SATB2         | NCL       |
| GSK3A     | HIST3H2BA     | ID2       |
| GYG1      | PLCH1         | TOX2      |
| GZMA      | PTGER2        | SH2D1B    |
| GZMK      | RP11-121A8.1  | RUNX2     |
| HENMT1    | JAKMIP1       | DLGAP5    |
| HIST1H2AG | PTGDR         | MAFB      |
| HIST1H2AL | XCL1          | GAB3      |
| HIST1H2BJ | LILRB5        | CKAP2L    |



|           |               |           |
|-----------|---------------|-----------|
| HIST1H2BO | DDN           | CCL5      |
| HIST1H3G  | PRF1          | YARS      |
| HIST1H3I  | FN1           | TGFBR3    |
| HJURP     | TRGV9         | S100PBP   |
| HLTF      | RP11-120K18.2 | ABCA2     |
| ID2       | SIGLEC1       | DOK2      |
| ITGA1     | HK3           | HELZ E    |
| ITPK1     | SMKR1         | ETFB      |
| KIF14     | KLRC4-KLRK1   | SLC27A2   |
| KLRC1     | DPP4          | ADSS      |
| KLRD1     | GZMH          | SNTB1     |
| MAGOHB    | PI15          | CERS6     |
| MATK      | MRC1L1        | GYG1      |
| MICAL2    | C1QB          | SUCNR1    |
| MSL3P1    | KLRC4         | B4GALT5   |
| MTBP      | MTRNR2L12     | HIST1H2BO |
| MTHFD1    | CCL4          | AUTS2     |
| MTHFD2    | SPAG6         | POMGNT2   |
| MYO1F     | GNLY          | HAVCR2    |
| NCALD     | HPDL          | CD3E      |
| NCAM1     | DNMT3B        | ARID1A    |
| NCL       | CD244         | PDE4A     |
| NKG7      | RP11-484L8.1  | ZADH2     |
| PDE4A     | FAM172BP      | CCL13     |
| PDE4D     | OASL          | ZAP70     |
| PHLDA1    | LILRA3        | PLAU      |
| PRDM8     | SLC4A4        | MATK      |
| PRF1      | AC010970.2    | HLTF      |
| PRR5L     | CATSPER1      | KCNE1     |
| PTGDR     | SERPINE1      | FHL3      |
| PTGER2    | CXCL11        | DPYSL2    |
| PTP4A1    | AC069363.1    | SH2D1A    |
| RAD51D    | GZMK          | SAMD3     |
| RASGEF1A  | HIST3H2A      | CHSY1     |
| RASSF4    | EOMES         | ARHGAP30  |

|          |              |           |
|----------|--------------|-----------|
| RBPJ     | LILRA6       | RGS3      |
| RGL1     | FAM47E-STBD1 | PTGDR     |
| RGS3     | LGALS1       | GDF6      |
| RNF125   | HIST3H2BB    | DPP4      |
| RNF213   | DHRS2        | HIST1H3I  |
| RPS6KA3  | KIR3DX1      | HENMT1    |
| RRP12    | CELSR3       | TIPARP    |
| S100PBP  | C4orf50      | FAM102B   |
| SAMD3    | AC104135.3   | SEC31B    |
| SATB2    | PPP2R2B      | ANKRD28   |
| SCD      | CCDC74A      | ZBTB2     |
| SEC31B   | FCER1G       | TSEN15    |
| SH2D1A   | COLGALT2     | COMMD7    |
| SH2D2A   | TYROBP       | SLC25A44  |
| SLC16A6  | GBP5         | APMAP     |
| SLC19A1  | APOL4        | ZNF609    |
| SLC20A1  | KLHL4        | ITGA1     |
| SLC25A44 | SPRY2        | COLGALT2  |
| SLC27A2  | FOXD2-AS1    | HIST1H2AL |
| SLC4A10  | MT2A         | ANTXR2    |
| SLC5A3   | C1QA         | GZMK      |
| SLC8A1   | HSD11B1      | MS4A6A    |
| SLX4IP   | FAM179A      | NKG7      |
| SMYD2    | LILRB2       | MTHFD2    |
| SNTB1    | SAMD3        | SATB2     |
| SNX18    | PLTP         | JAKMIP1   |
| SPRY2    | SERPING1     | ZYX       |
| SUPT3H   | RP11-214O1.2 | SUPT3H    |
| TESC     | SLC6A12      | SCD       |
| TGFBR3   | CST7         | CMC1      |
| TIPARP   | TIMP1        | GALC      |
| TNFSF14  | LINC00484    | DRAM1     |
| TOX2     | C19orf57     | CRIM1     |
| TPST2    | FCGR2A       | HIST1H3G  |
| TSEN15   | AMH          | ARRB1     |

|         |                |           |
|---------|----------------|-----------|
| UBASH3A | MANEAL         | DAPK2     |
| YARS    | F2R            | CTSD      |
| YPEL1   | TSPAN2         | DKC1      |
| ZADH2   | CTD-2377D24.6  | MTBP      |
| ZAP70   | TRGV10         | SMYD2     |
| ZBTB2   | MT-ATP8        | ECI2      |
| ZNF367  | SLAMF8         | CDC7      |
| ZYX     | CCL5           | MVB12B    |
| ABCA2   | USP44          | UBASH3A   |
| ATP8B4  | CCL18          | SLC4A10   |
| B4GALT5 | RP11-539L10.2  | RNF213    |
| BVES    | C1QC           | CEP57L1   |
| CCL13   | AC015849.16    | FASLG     |
| CMKLR1  | MS4A4A         | NMUR1     |
| COL4A2  | FAM26F         | PRDM8     |
| COL6A3  | TCN2           | GZMH      |
| CTSD    | TRGV8          | GPR65     |
| DAPK2   | TESC           | DDFA      |
| DHRS2   | S100A4         | ARHGAP18  |
| DNMT3B  | NRROS          | MSL3P1    |
| ENC1    | CCR1           | SLC16A6   |
| GAB3    | RP11-357H14.17 | GZMA      |
| GALC    | EDA2R          | DENND1B   |
| GDF6    | LDHAP4         | IFNG      |
| GNLY    | DTHD1          | GLUL      |
| GPR171  | C1orf61        | SLC20A1   |
| GRAMD1B | WNT8B          | MICAL2    |
| GZMB    | F13A1          | ZNF367    |
| GZMH    | CXCR2P1        | PRR5L     |
| HAVCR2  | BATF2          | SLX4IP    |
| HELZ    | SCD            | C19orf54  |
| HSD11B1 | GCNT1          | LINC00707 |
| IFNG    | ITPRIPL1       | RRP12     |
| ITGAD   | SH2D2A         | CADM1     |
| JAKMIP1 | GALNT15        | HJURP     |

|           |                |         |
|-----------|----------------|---------|
| KCNE1     | CD160          | NCALD   |
| KIF23     | CXCL10         | GAS7    |
| LINC00707 | IFNG           | RAD51D  |
| MAFB      | CLDND2         | MYO1F   |
| MS4A4A    | TIGD4          | RNF125  |
| MS4A6A    | GBP1           | COL6A3  |
| MVB12B    | IL2RB          | RNF130  |
| NMUR1     | KCNE1          | ENC1    |
| PLAU      | IL32           | PTP4A1  |
| POMGNT2   | CTD-2313F11.1  | CLDND2  |
| PXN       | SCARNA22       | HSD11B1 |
| RAB20     | RP11-222K16.2  | GSK3A   |
| RNF130    | IL10           | BCAT1   |
| SH2D1B    | RP11-290F20.3  | TESC    |
| SIGLEC9   | DYSF           | TNFSF14 |
| STK39     | FCN1           | KLRD1   |
| SUCNR1    | SEC31B         | CENPF   |
| TMPRSS3   | SULF1          | RPS6KA3 |
| WNT8B     | FAH            | DHRS2   |
| ZNF609    | GREB1          | CTSC    |
| ERF       | CD209          |         |
| ACSF3     | PILRA          |         |
| ACTR1B    | FCRL6          |         |
| ACVR2A    | CLEC12A        |         |
| ADA       | SH2D1A         |         |
| ADA2      | CRISPLD2       |         |
| ADAMTS6   | MVB12B         |         |
| AFAP1L2   | HENMT1         |         |
| AGFG2     | FOXD2          |         |
| AKAP5     | FPR2           |         |
| ANKMY1    | FAM64A         |         |
| ANKRD11   | TNFSF14        |         |
| AP1G2     | TNFRSF8        |         |
| AP5S1     | RP11-277P12.20 |         |
| ARMC9     | BSN            |         |

|            |            |  |
|------------|------------|--|
| ARNT       | TBX21      |  |
| ASAH2B     | TOX2       |  |
| ASB7       | ACE        |  |
| ASXL2      | IFITM2     |  |
| ATG7       | CLEC5A     |  |
| AZI2       | LRRC37A9P  |  |
| B3GNT2     | IL12RB2    |  |
| B3GNT7     | GIMAP4     |  |
| BAK1       | C2         |  |
| BANP       | SNORA71C   |  |
| BCAS2      | PYHIN1     |  |
| BCL2L11    | PSTPIP2    |  |
| BCYRN1     | SDC3       |  |
| BLMH       | RNU5E-1    |  |
| BLOC1S2    | KIF14      |  |
| BLOC1S6    | TMEM150B   |  |
| BNC2       | ZMYND10    |  |
| BTBD3      | SLFN13     |  |
| C17orf67   | TMPRSS3    |  |
| C3orf58    | RDM1       |  |
| C3orf67    | RAET1K     |  |
| C5         | AP000783.1 |  |
| C9orf139   | SNORA84    |  |
| CARD19     | FGR        |  |
| CATSPERE   | CENPF      |  |
| CCDC107    | SPOCK1     |  |
| CCDC186    | SKA3       |  |
| CD200R1    | LANCL3     |  |
| CDC37      | CHN2       |  |
| CDK1       | SLC38A5    |  |
| CDKN1A     | IFITM1     |  |
| CDKN2B-AS1 | SLC39A14   |  |
| CENPS-CORT | ABCA17P    |  |
| CHCHD5     | SIGLEC17P  |  |
| CHD3       | COL4A1     |  |

|            |            |  |
|------------|------------|--|
| CIC        | AC017002.2 |  |
| CNIH3      | LINC00707  |  |
| CNIH4      | ATP8B4     |  |
| COMMD1     | BVES       |  |
| COMMD6     | CADM1      |  |
| COMMD9     | CD3E       |  |
| CPD        | HSPA6      |  |
| CSGALNACT2 | CMTM1      |  |
| CSTF1      | HCST       |  |
| CWC27      | CKLF       |  |
| DAXX       | FOXM1      |  |
| DDX1       | POLR3G     |  |
| DDX12P     | C12orf75   |  |
| DGKE       | RHOA       |  |
| DNAJB14    | HLTF       |  |
| DNAJB6     | GYG1       |  |
| DNAJC8     | PSME2P2    |  |
| DRAXIN     | HIST1H2BO  |  |
| DUSP28     | LINC00888  |  |
| DYNLRB2    | STK39      |  |
| DZIP3      | C7orf13    |  |
| EDEM3      | CCR5       |  |
| EEF1AKMT2  | ABCA2      |  |
| EFNA5      | MARCO      |  |
| EIF1AX     | KLRK1      |  |
| EIF3D      | HOXB4      |  |
| EIF4G2     | ANKRD18B   |  |
| ELL        | KIF15      |  |
| ELL2       | SYCE2      |  |
| ENKUR      | RUNX2      |  |
| ERCC6L2    | LILRA5     |  |
| ERMP1      | PHLDA1     |  |
| EXOSC7     | SPN        |  |
| EXT1       | SUCNR1     |  |
| EXTL2      | ATP10A     |  |

|               |                |  |
|---------------|----------------|--|
| FAM129A       | PLCB1          |  |
| FAM133B       | WNT10B         |  |
| FAM192A       | ADAMTS17       |  |
| FBXL17        | CDIP1          |  |
| FBXW8         | RP5-857K21.11  |  |
| FCGR3B        | HOXB7          |  |
| FHIT          | DAPK2          |  |
| FKBP1A        | ANKRD13B       |  |
| FKBP1A-SDCBP2 | AUTS2          |  |
| FLJ42351      | PLEKHG4        |  |
| FLOT1         | SAPCD2         |  |
| FOCAD         | ITGA1          |  |
| FOSB          | RP11-1094M14.8 |  |
| FOXB1         | STXBP5L        |  |
| FSIP1         | APOBR          |  |
| FUT7          | TGFBR3         |  |
| GABARAPL1     | MYO1F          |  |
| GATA3-AS1     | MICAL2         |  |
| GNPTAB        | HIST1H2BE      |  |
| GOLGA4        | KIF18B         |  |
| GPR176        | PLA2G16        |  |
| GTDC1         | AC093673.5     |  |
| GTPBP8        | MCM10          |  |
| H2AFZ         | PDF            |  |
| HERC1         | RP11-473M20.7  |  |
| HIF1AN        | HAVCR2         |  |
| HIKESHI       | HLA-G          |  |
| HIST1H1B      | STOX1          |  |
| HIST1H2AM     | TLR8           |  |
| HIST1H2BH     | CLSPN          |  |
| HIST1H2BI     | DTL            |  |
| HIST1H3A      | CRTAM          |  |
| HIST1H3J      | SNORA80B       |  |
| HIST1H4A      | DNAJC6         |  |
| HIST1H4B      | SNORA80        |  |

|              |                |  |
|--------------|----------------|--|
| HIST1H4H     | PSAT1          |  |
| HIST1H4L     | SSBP4          |  |
| HLA-F        | SFMBT2         |  |
| HLA-F-AS1    | GOLM1          |  |
| HOPX         | CRIM1          |  |
| ID2-AS1      | RP1-90J20.12   |  |
| IFT52        | KCNJ10         |  |
| IGF2R        | KIAA1161       |  |
| IMMP2L       | RP11-452D12.1  |  |
| ISCA1        | RORB           |  |
| KCMF1        | XRCC2          |  |
| KIAA0319L    | ARHGAP18       |  |
| KIAA0513     | ANKRD30BL      |  |
| KPNB1        | FHL3           |  |
| L3MBTL3      | IFI6           |  |
| LAT          | COL6A3         |  |
| LIMD1        | RP4-647J21.1   |  |
| LIMD1-AS1    | ID2            |  |
| LINC00271    | RP11-259N19.1  |  |
| LINC00471    | TRIM46         |  |
| LINC00886    | RP11-1094M14.5 |  |
| LINS1        | HIST1H2BJ      |  |
| LMO4         | PRDM8          |  |
| LOC100128242 | POSTN          |  |
| LOC100507506 | NT5M           |  |
| LOC100507507 | GFOD1          |  |
| LOC101926948 | MKI67          |  |
| LOC101928847 | CCL2           |  |
| LOC101929541 | RNF125         |  |
| LOC101929710 | RNU5D-1        |  |
| LOC102724084 | ADCY3          |  |
| LOC102724814 | PDP2           |  |
| LOC105370941 | HTATSF1P2      |  |
| LOC152048    | GZMM           |  |
| LOC256880    | APOBEC3G       |  |



|           |                |  |
|-----------|----------------|--|
| LOC642846 | MIR663A        |  |
| LOC729291 | CTSL           |  |
| LRCH4     | IL2RA          |  |
| LRP2      | TEX30          |  |
| MAGEF1    | TMEM229B       |  |
| MAN1A1    | TMEM63C        |  |
| MAP3K7CL  | HIST1H2AB      |  |
| MAP4K1    | PRSS1          |  |
| MAPK1     | ADORA3         |  |
| MCM5      | ADAMTS4        |  |
| METTL18   | PRR11          |  |
| MFSD1     | IQGAP2         |  |
| MIIP      | IPCEF1         |  |
| MIR1181   | CCDC15         |  |
| MIR6125   | GOLIM4         |  |
| MKKS      | RP11-1094M14.4 |  |
| MLLT3     | GATA3          |  |
| MMAA      | GRAMD1B        |  |
| MOB1A     | FRMPD3         |  |
| MRPL13    | SNORA34        |  |
| MRPL44    | TLN2           |  |
| MRPS6     | HIST1H3I       |  |
| MYOF      | SERPINA1       |  |
| MZT1      | PRAF2          |  |
| NAA38     | TMEM97         |  |
| NAP1L1    | LCP2           |  |
| NCOA2     | TSEN15         |  |
| NDUFA9    | ZNF74          |  |
| NDUFAF2   | SKA1           |  |
| NDUFB8    | HIPK2          |  |
| NECTIN3   | PDE4A          |  |
| NEK2      | TLE6           |  |
| NEPRO     | DDX11L2        |  |
| NFIA      | CTSB           |  |
| NGRN      | SLC39A8        |  |

|            |            |  |
|------------|------------|--|
| NMRK1      | MSL3P1     |  |
| NOL11      | HIST1H2AL  |  |
| NOP10      | SIGLEC9    |  |
| NTRK1      | HIST1H3G   |  |
| NUDT15     | SNX10      |  |
| OAZ2       | OSCAR      |  |
| OLMALINC   | PHF19      |  |
| ORC4       | BATF3      |  |
| OSBPL7     | TPX2       |  |
| OSTF1      | GBP4       |  |
| PAM        | TRIM36     |  |
| PDHX       | LILRB4     |  |
| PELO       | SLFN12L    |  |
| PEX14      | AC144652.1 |  |
| PGAM1      | ASPM       |  |
| PHF3       | PSRC1      |  |
| PLCXD2     | SCCPDH     |  |
| PLGRKT     | RHOC       |  |
| PMF1       | CD38       |  |
| PMF1-BGLAP | SLA2       |  |
| POLR2F     | HIST1H2AG  |  |
| POP4       | PXDN       |  |
| PPA2       | MTHFD1L    |  |
| PPCDC      | CMC1       |  |
| PPFIBP1    | GF11       |  |
| PPID       | ADAP1      |  |
| PPIL2      | FOSL1      |  |
| PPP2R5A    | TERC       |  |
| PPTC7      | CENPO      |  |
| PRCC       | SNORA71B   |  |
| PRKACB     | STIL       |  |
| PRPF38B    | ZAP70      |  |
| PRPF40A    | CD33       |  |
| PSAP       | GPRIN3     |  |
| PSMB9      | TICRR      |  |

|              |              |  |
|--------------|--------------|--|
| QDPR         | TYMS         |  |
| RAB12        | NUCB2        |  |
| RAB35        | P2RY6        |  |
| RANBP6       | HJURP        |  |
| RB1CC1       | DOK2         |  |
| RHOB         | INSIG1       |  |
| RMND1        | CDCA8        |  |
| RNASEH2B     | ECI2         |  |
| RNASEH2B-AS1 | CD96         |  |
| RNF138       | CHEK1        |  |
| RNF2         | PTGER4       |  |
| RNF6         | USP13        |  |
| RNPEPL1      | CD300E       |  |
| RPA3         | CYP1B1       |  |
| RPL26L1      | CDK6         |  |
| RPLP1        | KB-1732A1.1  |  |
| RPS20        | STOM         |  |
| RPS3         | ECT2         |  |
| SACM1L       | COL4A2       |  |
| SAMD12       | LY6E         |  |
| SAT1         | ABCB1        |  |
| SCAMP1       | CEP41        |  |
| SCAMP1-AS1   | CYSLTR2      |  |
| SCAMP2       | MT-ATP6      |  |
| SCRN3        | ARRB2        |  |
| SDCBP        | RARRES3      |  |
| SDCBP2       | E2F7         |  |
| SDCBP2-AS1   | MIR3687      |  |
| SELENOS      | GIMAP6       |  |
| SF3A3        | FAM86JP      |  |
| SFT2D2       | GPR171       |  |
| SGMS1        | CTD-2510F5.4 |  |
| SGMS1-AS1    | APOL1        |  |
| SLC16A7      | SOAT1        |  |
| SLC30A1      | PRKCQ        |  |

|            |                |  |
|------------|----------------|--|
| SLC35B3    | MEFV           |  |
| SLC41A2    | HIST1H1D       |  |
| SMARCE1    | RP13-735L24.1  |  |
| SMIM15     | SNTB1          |  |
| SMIM15-AS1 | LRFN4          |  |
| SNAP47     | KIF21B         |  |
| SNORD54    | C15orf39       |  |
| SNRPA      | CDCA5          |  |
| SNRPA1     | TDO2           |  |
| SP4        | CMKLR1         |  |
| SPATS2L    | C11orf84       |  |
| SPG21      | CBX2           |  |
| SPIDR      | TIMP3          |  |
| SPNS1      | NBPF16         |  |
| SQOR       | MSH5           |  |
| SRP14      | AC004840.9     |  |
| ST6GALNAC3 | SNORA71A       |  |
| STAM2      | C18orf54       |  |
| STK38L     | KIF2C          |  |
| SUB1       | TROAP          |  |
| SUCLG2     | PAICS          |  |
| SUCLG2-AS1 | EMILIN2        |  |
| SUCO       | PAQR6          |  |
| SUPV3L1    | KIF21A         |  |
| SYF2       | CD300C         |  |
| SYTL2      | MOV10          |  |
| TAPBP      | RNU11          |  |
| TBC1D1     | HIVEP3         |  |
| TBC1D30    | FAM86C1        |  |
| TBKBP1     | CERS6          |  |
| TCTN1      | RP11-686D22.10 |  |
| TES        | AUNIP          |  |
| TET2       | FMN1           |  |
| THEM4      | SLC7A5P1       |  |
| THEMIS     | RP11-932O9.10  |  |

|            |               |  |
|------------|---------------|--|
| TIPARP-AS1 | MDGA1         |  |
| TM9SF3     | RP11-473M20.9 |  |
| TMBIM6     | PPAT          |  |
| TMEM230    | PFKP          |  |
| TMEM241    | SMC4          |  |
| TMEM72-AS1 | LRP8          |  |
| TMF1       | XYLB          |  |
| TP63       | UBE2C         |  |
| TRAF2      | TOP2A         |  |
| TRAPPC8    | ZYX           |  |
| TRIM25     | CEP55         |  |
| TRIM33     | UBE2T         |  |
| TRIM44     | KIF23         |  |
| TRIP12     | SPAG5         |  |
| TRPS1      | POLQ          |  |
| TTC19      | GBP1P1        |  |
| U2SURP     | SAP30         |  |
| UBE3C      | SLC29A1       |  |
| ULK3       | DFNB31        |  |
| UMPS       | FAM72B        |  |
| UPP1       | FANCI         |  |
| UQCRB      | BOP1          |  |
| UQCRFS1    | FAM20C        |  |
| USP15      | RP11-443B20.1 |  |
| UTP11      | CDC25A        |  |
| WDR26      | BUB1          |  |
| WSB1       | LDLR          |  |
| XPNPEP1    | PUS7          |  |
| XPO7       | PRKCH         |  |
| ZBED5      | FTL           |  |
| ZBED5-AS1  | DBF4B         |  |
| ZBTB22     | WARS          |  |
| ZCCHC6     | LASP1         |  |
| ZCWPW2     | PDE1B         |  |
| ZDHHC7     | CMPK2         |  |

|              |            |  |
|--------------|------------|--|
| ZFAT         | LRRC8C     |  |
| ZFR          | TRERF1     |  |
| ZNF281       | SLC16A1    |  |
| ZNF558       | FBXO41     |  |
| ZNF718       | KIAA1524   |  |
| ZNF792       | C16orf59   |  |
| ZNRD1ASP     | YWHAH      |  |
| AADAC        | NLGN4X     |  |
| AADA2L2-AS1  | HIST1H2BN  |  |
| ACOT9        | OAS2       |  |
| ACOXL        | FKBP5      |  |
| ACOXL-AS1    | TSHZ3      |  |
| ACSL6        | ARHGAP11A  |  |
| ACTL9        | MS4A6A     |  |
| ADAM29       | PXMP2      |  |
| ADAMTS1      | C3AR1      |  |
| ADAMTS10     | SBK1       |  |
| ADAMTS14     | CENPE      |  |
| ADAMTS19     | ALG3       |  |
| ADAMTS19-AS1 | CDCA2      |  |
| ADAMTS5      | TONSL      |  |
| ADD3-AS1     | ECE2       |  |
| ADGRG1       | DCLRE1B    |  |
| ADGRL3       | DCLRE1A    |  |
| ADGRL3-AS1   | LYAR       |  |
| ADORA2B      | HIST2H2BE  |  |
| ADRA1A       | KCNAB2     |  |
| ADRB1        | MESDC1     |  |
| AGTRAP       | GBAP1      |  |
| AHI1         | STRIP2     |  |
| AIRN         | NEIL3      |  |
| AKAP12       | RAD54L     |  |
| ALDH8A1      | CASC5      |  |
| ALKAL1       | INPP4B     |  |
| AMZ1         | FBXL19-AS1 |  |

|              |              |  |
|--------------|--------------|--|
| ANAPC1P1     | PGAP1        |  |
| ANK2         | PTPN7        |  |
| ANKRD36BP1   | FADS1        |  |
| AOAH-IT1     | FASN         |  |
| APBA2        | MIR4435-1HG  |  |
| ARHGAP26-AS1 | GBP2         |  |
| ARL6IP4      | FKBP4        |  |
| ARNTL2       | ENC1         |  |
| ASAH2        | ERCC6L       |  |
| ASAP3        | HSP90AB1     |  |
| ASZ1         | PA2G4        |  |
| ATP8A2       | ITPK1        |  |
| ATP9A        | RRM2         |  |
| B3GALT1      | UBE2L6       |  |
| BBS12        | NCAPH        |  |
| BCR          | RNU6ATAC     |  |
| BICDL1       | GCH1         |  |
| BMP2         | FAR2         |  |
| BVES-AS1     | RP11-427H3.3 |  |
| C10orf55     | IL15         |  |
| C16orf97     | TFR2         |  |
| C1orf100     | PSTPIP1      |  |
| C1orf140     | C2orf48      |  |
| C1orf226     | TSHZ1        |  |
| C20orf203    | FEN1         |  |
| C2orf92      | CYSTM1       |  |
| C3           | LPAL2        |  |
| C3orf35      | RNF213       |  |
| C4orf45      | FAM102B      |  |
| C4orf51      | SLC16A6      |  |
| C9orf106     | SPC24        |  |
| C9orf92      | RASGEF1A     |  |
| CA10         | DPY19L2P2    |  |
| CA5A         | SNORD104     |  |
| CACNA1E      | SUV39H2      |  |

|             |          |  |
|-------------|----------|--|
| CACNG4      | PXN      |  |
| CACNG5      | GDF11    |  |
| CAMK2G      | FPR1     |  |
| CASC20      | DPF3     |  |
| CASC22      | APOL3    |  |
| CASS4       | STX11    |  |
| CBLN2       | FAM72D   |  |
| CCDC68      | PROB1    |  |
| CCDC80      | XRCC6BP1 |  |
| CCL1        | VIM      |  |
| CCL11       | CIT      |  |
| CCL15       | WDHD1    |  |
| CCL15-CCL14 | NME1     |  |
| CCL7        | MPP1     |  |
| CCL8        | TUBB     |  |
| CD200R1L    | PLAU     |  |
| CD300A      | SLC25A53 |  |
| CD34        | HIRIP3   |  |
| CD36        | MTHFD1   |  |
| CD70        | LARP1    |  |
| CDC20B      | SRI      |  |
| CDCP1       | ZNF280B  |  |
| CECR3       | NCR3LG1  |  |
| CETN4P      | WDR54    |  |
| CFAP45      | CMTM3    |  |
| CFTR        | PLA2G7   |  |
| CHST2       | STAT1    |  |
| CHSY3       | GNPNAT1  |  |
| CLEC2A      | C5orf30  |  |
| CLEC3B      | EME1     |  |
| CLIC5       | PNPO     |  |
| CLNK        | IFIT3    |  |
| CLRN2       | PIGW     |  |
| CNBD1       | KTN1-AS1 |  |
| CNTN4       | RPS6KA3  |  |



|               |               |  |
|---------------|---------------|--|
| CNTN4-AS2     | ARMC5         |  |
| CNTN6         | SLC20A1       |  |
| COL14A1       | SPATA13       |  |
| COL4A2-AS1    | GSG2          |  |
| COLQ          | LMNB1         |  |
| CORT          | VCAN          |  |
| COX6A2        | SHROOM1       |  |
| CPLX3         | TSEN54        |  |
| CRAT37        | CTSC          |  |
| CRYBA4        | GTSE1         |  |
| CRYBB1        | CELF2         |  |
| CRYBB3        | MAPKAPK3      |  |
| CSF2          | CHAMP1        |  |
| CSMD3         | SH3BP1        |  |
| CTD-2350J17.1 | SPRY4         |  |
| CTNNA2        | PLK4          |  |
| CTXND2        | TUBA1B        |  |
| CX3CR1        | HELLS         |  |
| CXADRP2       | ATAD2         |  |
| CYYR1         | RP11-713M15.1 |  |
| DACH1         | BCAT1         |  |
| DCAF4L2       | E2F8          |  |
| DDIT4L        | SYTL3         |  |
| DEPP1         | GSK3A         |  |
| DHRS9         | FSD1          |  |
| DINOL         | POLR1A        |  |
| DLEU7-AS1     | FXN           |  |
| DMBT1         | FAM216A       |  |
| DMD           | ADAP2         |  |
| DNER          | KNSTRN        |  |
| DRAIC         | DLGAP5        |  |
| DYNAP         | FOXRED2       |  |
| EDAR          | RACGAP1       |  |
| EDF1          | KIF11         |  |
| EDN1          | MYADM         |  |

|            |                |  |
|------------|----------------|--|
| EEF1DP3    | PM20D2         |  |
| EIF1AX-AS1 | RP11-61A14.3   |  |
| EIF2AK4    | PFAS           |  |
| ELFN2      | NFAM1          |  |
| ENO3       | GIMAP5         |  |
| EPHA1      | MELK           |  |
| EPHB3      | RP11-1094M14.9 |  |
| ERCC1      | ANTXR2         |  |
| ESM1       | NFATC3         |  |
| ESRRG      | APOC1          |  |
| EVADR      | ZCCHC3         |  |
| EVI5       | NCAPG          |  |
| EYA4       | COMMD7         |  |
| EYS        | LINC00422      |  |
| FAM184A    | WDR62          |  |
| FAM198A    | TMEM201        |  |
| FAM19A1    | TRIP13         |  |
| FAM20A     | RNF130         |  |
| FAM47A     | GPR19          |  |
| FAM84A     | HAS2           |  |
| FAT3       | DUSP4          |  |
| FBXL7      | SLAMF7         |  |
| FBXW4P1    | PNMA1          |  |
| FER        | DSCC1          |  |
| FERMT1     | CSNK2B         |  |
| FEZ2       | ABCE1          |  |
| FFAR4      | NCAPG2         |  |
| FGD4       | RHEBL1         |  |
| FGF5       | ALDH1B1        |  |
| FKBP8      | DAB2           |  |
| FMNL2      | ATP8B3         |  |
| FNIP2      | JAKMIP2        |  |
| FOXG1-AS1  | GALM           |  |
| FOXP2      | PKMYT1         |  |
| FREM2      | UBE2S          |  |

|             |               |  |
|-------------|---------------|--|
| FREM2-AS1   | ATP1A3        |  |
| FRY         | MICB          |  |
| FRY-AS1     | CCDC86        |  |
| FXVD2       | CDC25B        |  |
| FXVD6       | SNORA31       |  |
| FXVD6-FXVD2 | GLUL          |  |
| GACAT2      | ZADH2         |  |
| GADD45G     | CCNA2         |  |
| GALNT17     | EXO1          |  |
| GALNT8      | PTPN22        |  |
| GCNA        | RP11-274E7.2  |  |
| GGNBP1      | MYO7A         |  |
| GHRLOS      | C20orf112     |  |
| GLI3        | CENPV         |  |
| GNAI1       | RUNX1         |  |
| GNAT3       | DMXL2         |  |
| GPR27       | SLC19A1       |  |
| GPR87       | PYCR1         |  |
| GPRC5C      | CENPI         |  |
| GPX8        | CHTF18        |  |
| GRIK4       | NCL           |  |
| GRM5        | GMPS          |  |
| GRM5-AS1    | CBLB          |  |
| GTSF1L      | AC116366.5    |  |
| GUCA1A      | KDELC1        |  |
| GUCA2B      | RRP9          |  |
| GUCY1B2     | AGO2          |  |
| HABP4       | KIF4A         |  |
| HAVCR1      | CTPS1         |  |
| HCG20       | FADS2         |  |
| HDC         | ACAA2         |  |
| HEATR9      | SLX4IP        |  |
| HECW1       | MLKL          |  |
| HFM1        | KSR1          |  |
| HGF         | RP11-644F5.11 |  |

|           |          |  |
|-----------|----------|--|
| HKDC1     | DEPDC1B  |  |
| HLX       | LIN7A    |  |
| HLX-AS1   | ME2      |  |
| HMOX1     | FAM127B  |  |
| HS3ST4    | CD14     |  |
| HS6ST3    | FAM72A   |  |
| HSD17B3   | MCM8     |  |
| HSD52     | TTYH3    |  |
| HSPA4L    | ERI1     |  |
| HSPA7     | SGOL1    |  |
| HTRA1     | SLC43A3  |  |
| HTT       | PATL1    |  |
| HULC      | CCSAP    |  |
| IER3      | UBASH3A  |  |
| IER3-AS1  | NDC80    |  |
| IFITM10   | NCAPD3   |  |
| IFNG-AS1  | ATN1     |  |
| IL18R1    | PPRC1    |  |
| IL18RAP   | HOXB3    |  |
| IL21      | LRRC25   |  |
| IL21-AS1  | SNORA79  |  |
| IL22      | GPATCH4  |  |
| IL26      | KPNA2    |  |
| IL3       | GPR84    |  |
| ILDR1     | NPL      |  |
| INHBA     | WRNIP1   |  |
| INHBA-AS1 | HSPD1    |  |
| INSRR     | NACC1    |  |
| INTU      | AIF1     |  |
| IQCN      | OAF      |  |
| ISYNA1    | RAD51D   |  |
| ITGA2     | TDRD6    |  |
| ITGB5     | B4GALT5  |  |
| ITLN1     | RNU2-61P |  |
| ITM2A     | STARD3NL |  |

|           |              |  |
|-----------|--------------|--|
| ITPK1-AS1 | CHAF1B       |  |
| JAG1      | C9orf89      |  |
| JPH4      | RP11-452L6.5 |  |
| KCNA1     | XCR1         |  |
| KCNA6     | WAS          |  |
| KCNJ12    | NUF2         |  |
| KCNJ15    | C20orf27     |  |
| KCNJ18    | MIR181A1HG   |  |
| KIAA1024L | ABCA1        |  |
| KIAA1671  | MAFB         |  |
| KIAA2026  | CENPA        |  |
| KIF13B    | TGM2         |  |
| KIF3C     | NOP2         |  |
| KLRA1P    | PLK1         |  |
| KRT222    | CKAP5        |  |
| KRT71     | APOL6        |  |
| KRT72     | ITK          |  |
| KRT74     | 40787        |  |
| KTN1      | SLFN11       |  |
| LAMA2     | COA7         |  |
| LDB2      | COL15A1      |  |
| LDLRAD3   | ANP32E       |  |
| LHFPL2    | ZNF367       |  |
| LIM2      | SNHG17       |  |
| LINC00092 | BRCA2        |  |
| LINC00189 | C19orf54     |  |
| LINC00222 | ALG8         |  |
| LINC00243 | EAF1         |  |
| LINC00290 | ITGA5        |  |
| LINC00298 | TMEM164      |  |
| LINC00299 | SUV39H1      |  |
| LINC00336 | APOL2        |  |
| LINC00348 | PFN1         |  |
| LINC00355 | RP11-402J7.2 |  |
| LINC00359 | LAMB1        |  |

|           |              |  |
|-----------|--------------|--|
| LINC00376 | C9orf40      |  |
| LINC00395 | C20orf24     |  |
| LINC00415 | TRPV2        |  |
| LINC00433 | CDC7         |  |
| LINC00437 | CHAF1A       |  |
| LINC00440 | KHDC1        |  |
| LINC00462 | ZNF473       |  |
| LINC00491 | PSME2        |  |
| LINC00506 | SLCO4A1      |  |
| LINC00520 | CXCR3        |  |
| LINC00536 | RP11-10017.1 |  |
| LINC00560 | ZMIZ1        |  |
| LINC00563 | XPO5         |  |
| LINC00589 | IGSF6        |  |
| LINC00593 | RNU2-59P     |  |
| LINC00645 | RP11-485G4.2 |  |
| LINC00689 | ZNRF1        |  |
| LINC00706 | CKAP2L       |  |
| LINC00905 | CLPB         |  |
| LINC00919 | TTK          |  |
| LINC00943 | HNRNPLL      |  |
| LINC00944 | GINS4        |  |
| LINC01010 | HOXC4        |  |
| LINC01023 | ZWINT        |  |
| LINC01047 | RP4-800G7.2  |  |
| LINC01080 | DDX11        |  |
| LINC01140 | RRS1         |  |
| LINC01146 | SLC46A1      |  |
| LINC01227 | NRP1         |  |
| LINC01260 | ZKSCAN2      |  |
| LINC01267 | CENPJ        |  |
| LINC01279 | CEP152       |  |
| LINC01331 | GAB3         |  |
| LINC01333 | GAS7         |  |
| LINC01335 | CCT5         |  |

|           |             |  |
|-----------|-------------|--|
| LINC01344 | GLIPR2      |  |
| LINC01349 | ATAD5       |  |
| LINC01352 | KIF20B      |  |
| LINC01364 | CCDC65      |  |
| LINC01370 | TUBG1       |  |
| LINC01428 | CASC7       |  |
| LINC01449 | UCK2        |  |
| LINC01482 | AC093616.4  |  |
| LINC01503 | TOMM40L     |  |
| LINC01508 | SLA         |  |
| LINC01532 | CHSY1       |  |
| LINC01571 | ATF5        |  |
| LINC01625 | RNASEH1-AS1 |  |
| LINC01633 | ZMYM3       |  |
| LINC01693 | ISG20L2     |  |
| LINC01694 | BST2        |  |
| LINC01699 | LRIF1       |  |
| LINC01713 | TNIK        |  |
| LINC01728 | SPDL1       |  |
| LINC01751 | SAMHD1      |  |
| LINC01759 | C17orf53    |  |
| LINC01762 | MDC1        |  |
| LINC01776 | E2F1        |  |
| LINC01790 | MSN         |  |
| LINC01804 | PRR3        |  |
| LINC01814 | TRIM14      |  |
| LINC01815 | DGKZ        |  |
| LINC01821 | FXYD5       |  |
| LINC01840 | CASP2       |  |
| LINC01844 | YARS        |  |
| LINC01852 | NUDT19      |  |
| LINC01899 | TNFRSF12A   |  |
| LINC01950 | FAM207A     |  |
| LINC01973 | NLN         |  |
| LINC01980 | NOP56       |  |

|              |              |  |
|--------------|--------------|--|
| LINC01981    | ENO1         |  |
| LINC01987    | RGL4         |  |
| LINC02015    | HNRNPAB      |  |
| LINC02042    | CTD-3099C6.9 |  |
| LINC02054    | RNU12        |  |
| LINC02057    | AVEN         |  |
| LINC02069    | SLC9B2       |  |
| LINC02072    | POLR1B       |  |
| LINC02073    | C2orf44      |  |
| LINC02099    | LMNB2        |  |
| LINC02127    | FOLR2        |  |
| LINC02149    | PRC1         |  |
| LINC02180    | FBXO5        |  |
| LINC02345    | CACNB1       |  |
| LINC02367    | RBMS1        |  |
| LINC02446    | DNA2         |  |
| LINC02493    | CHST11       |  |
| LINC02495    | SMC2         |  |
| LINC02497    | DONSON       |  |
| LINC02500    | URB2         |  |
| LINC02556    | RP5-1024G6.8 |  |
| LINCMD1      | STIP1        |  |
| LINP1        | GAS5-AS1     |  |
| LIPM         | RFWD3        |  |
| LMNB1-DT     | AGPAT1       |  |
| LMX1B        | CDC25C       |  |
| LOC100128317 | COX10        |  |
| LOC100128531 | KIF18A       |  |
| LOC100128988 | EIF2AK2      |  |
| LOC100129291 | PSME3        |  |
| LOC100129297 | INCENP       |  |
| LOC100129316 | CD99         |  |
| LOC100131604 | KIF24        |  |
| LOC100192426 | CHST12       |  |
| LOC100287036 | TMX4         |  |



|              |              |  |
|--------------|--------------|--|
| LOC100288911 | NT5DC3       |  |
| LOC100506207 | TBC1D31      |  |
| LOC100506271 | ARHGAP11B    |  |
| LOC100506274 | FPR3         |  |
| LOC100507468 | CMSS1        |  |
| LOC100996671 | HSPH1        |  |
| LOC101927269 | AAK1         |  |
| LOC101927378 | APMAP        |  |
| LOC101927543 | NCALD        |  |
| LOC101927822 | MT-ND4L      |  |
| LOC101927844 | MYB          |  |
| LOC101927847 | GPR65        |  |
| LOC101927914 | RAB27A       |  |
| LOC101928021 | RP11-10K16.1 |  |
| LOC101928030 | HPRT1        |  |
| LOC101928053 | CDK2         |  |
| LOC101928231 | ATXN2L       |  |
| LOC101928791 | EMP3         |  |
| LOC101928988 | SCN1B        |  |
| LOC101928994 | DVL3         |  |
| LOC101929116 | SLC5A3       |  |
| LOC101929188 | SUPT16H      |  |
| LOC101929227 | CFH          |  |
| LOC101929331 | G6PD         |  |
| LOC101929353 | POLD1        |  |
| LOC101929452 | SLC36A1      |  |
| LOC101929549 | FYB          |  |
| LOC101929551 | TMEM185B     |  |
| LOC101929709 | GIMAP2       |  |
| LOC102467080 | CUL1         |  |
| LOC102467081 | FAM86A       |  |
| LOC102723968 | LGMN         |  |
| LOC102724434 | E2F2         |  |
| LOC105369431 | TRAIP        |  |
| LOC105369532 | PDCD11       |  |

|              |          |  |
|--------------|----------|--|
| LOC105370306 | PTPRJ    |  |
| LOC105372397 | RNU5B-1  |  |
| LOC105376975 | ACOT2    |  |
| LOC105377975 | CERS2    |  |
| LOC105616981 | BAZ1B    |  |
| LOC150935    | DKC1     |  |
| LOC153910    | MAP7D3   |  |
| LOC158434    | WHSC1    |  |
| LOC158435    | LIG3     |  |
| LOC284395    | GTF3C6   |  |
| LOC285762    | MEX3D    |  |
| LOC285766    | NOM1     |  |
| LOC339862    | ZBTB2    |  |
| LOC339902    | APOE     |  |
| LOC400800    | BRPF3    |  |
| LOC440084    | KIAA1958 |  |
| LOC646214    | RGS3     |  |
| LOC728715    | RECQL4   |  |
| LOC728755    | MAPRE1   |  |
| LOC729603    | ANPEP    |  |
| LOC729815    | NAT10    |  |
| LOC90768     | FAM105A  |  |
| LRIG1        | IFITM3   |  |
| LRRC20       | SNORA76  |  |
| LRRC37A8P    | MYRF     |  |
| LRRN3        | SLC7A5   |  |
| LRRTM4       | KLC2     |  |
| MAGI2        | SF3B4    |  |
| MAP7D2       | ASUN     |  |
| MARC1        | E2F3     |  |
| MAS1         | TAF5     |  |
| ME3          | RNU5A-1  |  |
| MED4-AS1     | BAX      |  |
| MFN2         | CENPN    |  |
| MGC34796     | RASSF1   |  |

|           |               |  |
|-----------|---------------|--|
| MIR1183   | MAGOHB        |  |
| MIR1234   | RP11-403113.8 |  |
| MIR133B   | CCDC85B       |  |
| MIR137HG  | RAD23B        |  |
| MIR195    | MNDA          |  |
| MIR199A1  | C21orf58      |  |
| MIR2053   | SGOL2         |  |
| MIR206    | STAB1         |  |
| MIR3118-2 | DRAM1         |  |
| MIR3118-3 | CHCHD4        |  |
| MIR3118-4 | GK5           |  |
| MIR3136   | DTX3L         |  |
| MIR3138   | NR1H3         |  |
| MIR3171   | SACS          |  |
| MIR326    | BIVM          |  |
| MIR340    | CACYBP        |  |
| MIR34AHG  | C17orf96      |  |
| MIR3614   | CTD-2547L24.3 |  |
| MIR3657   | GNL3L         |  |
| MIR3662   | CCDC150       |  |
| MIR3914-1 | PLAGL2        |  |
| MIR3973   | RASSF4        |  |
| MIR422A   | CENPL         |  |
| MIR4259   | SRPK1         |  |
| MIR4265   | DIAPH3        |  |
| MIR4266   | LINC00883     |  |
| MIR4270   | GNS           |  |
| MIR4290   | ARHGDI1       |  |
| MIR4290HG | AC079922.3    |  |
| MIR4304   | DCAF7         |  |
| MIR4460   | MAZ           |  |
| MIR4473   | MTR           |  |
| MIR4474   | H1FX          |  |
| MIR4479   | BLM           |  |
| MIR4493   | LRRCC1        |  |

|           |             |  |
|-----------|-------------|--|
| MIR4501   | EIF4A1      |  |
| MIR4522   | SNHG3       |  |
| MIR4529   | SLC8A1      |  |
| MIR4534   | MRM1        |  |
| MIR4665   | ARSG        |  |
| MIR4759   | RRP12       |  |
| MIR4771-1 | CCDC77      |  |
| MIR4771-2 | ATXN1       |  |
| MIR4772   | ZNF438      |  |
| MIR4776-1 | NUP107      |  |
| MIR4776-2 | GIT1        |  |
| MIR4777   | RAD23A      |  |
| MIR4789   | FGL2        |  |
| MIR497    | MT-CO2      |  |
| MIR5192   | BRCA1       |  |
| MIR544B   | SLC35B4     |  |
| MIR548H2  | SLFN5       |  |
| MIR548J   | PTGES3P1    |  |
| MIR548W   | C10orf2     |  |
| MIR556    | ESPL1       |  |
| MIR5680   | ZNF609      |  |
| MIR579    | F8A1        |  |
| MIR6088   | C14orf80    |  |
| MIR612    | RGL1        |  |
| MIR6124   | CALU        |  |
| MIR634    | HK2         |  |
| MIR6729   | PSMC3IP     |  |
| MIR6882   | PIF1        |  |
| MIR6892   | GSE1        |  |
| MIR7843   | TRGV4       |  |
| MIR887    | HCFC1       |  |
| MLANA     | ARID5A      |  |
| MMP16     | CTC-503J8.6 |  |
| MOAP1     | PRKACA      |  |
| MPZL2     | TOP3A       |  |

|              |            |  |
|--------------|------------|--|
| MS4A4E       | NCOA1      |  |
| MS4A6E       | CSF1       |  |
| MSANTD1      | NUDT6      |  |
| MTNR1B       | LBX2-AS1   |  |
| MTVR2        | PPARGC1B   |  |
| MYBL2        | KHSRP      |  |
| MYH13        | APOO       |  |
| MYH15        | SPRED1     |  |
| NAALADL2     | B3GNTL1    |  |
| NAALADL2-AS1 | RAB20      |  |
| NAALADL2-AS2 | CAD        |  |
| NAALADL2-AS3 | ITGAL      |  |
| NAXD         | LPCAT4     |  |
| NBAS         | CD2        |  |
| NBPF4        | METRNL     |  |
| NBPF6        | PDCD1LG2   |  |
| NCAM2        | ARRB1      |  |
| NCOR2        | POLE       |  |
| NCRUPAR      | AGPS       |  |
| NECTIN4      | AATF       |  |
| NELL2        | MSANTD3    |  |
| NETO1        | SFXN3      |  |
| NEURL3       | TTLL3      |  |
| NID2         | IL15RA     |  |
| NINJ1        | HLA-H      |  |
| NKAIN2       | ZNF280C    |  |
| NOS1AP       | PTPLAD1    |  |
| NPBWR1       | AC009948.5 |  |
| NPDC1        | NCKIPSD    |  |
| NPEPPS       | ARAP2      |  |
| NPM2         | ARID1A     |  |
| NPR3         | SIMC1      |  |
| NRON         | RAP2B      |  |
| NT5DC4       | RCN1       |  |
| NTM          | PREP       |  |

|            |              |  |
|------------|--------------|--|
| NUTM1      | TMEM194A     |  |
| NYAP2      | CCND2        |  |
| OPTC       | MTHFD2       |  |
| OR2B2      | PTMS         |  |
| OR2Z1      | RIN3         |  |
| OR7E156P   | TMCO6        |  |
| OXGR1      | DENND1B      |  |
| P2RY14     | ESYT2        |  |
| P3H2       | SLC38A7      |  |
| PALD1      | ATP2A2       |  |
| PANDAR     | ADAT2        |  |
| PAX8       | TLN1         |  |
| PAX8-AS1   | CENPK        |  |
| PCAT29     | SMYD2        |  |
| PCBP3      | PRIM2        |  |
| PCDH7      | NAIP         |  |
| PCDH9      | SP2          |  |
| PCDH9-AS4  | RPL26        |  |
| PCGEM1     | SAMD9L       |  |
| PDE6H      | TCF19        |  |
| PEX5L      | ADSS         |  |
| PHTF2      | CTA-384D8.36 |  |
| PKD2L1     | KNOP1        |  |
| PLCXD2-AS1 | MYCBPAP      |  |
| PNMA2      | IRF1         |  |
| POPDC3     | YPEL1        |  |
| POU3F1     | EFCAB4B      |  |
| PPARG      | SLC2A13      |  |
| PPP1R2B    | PWP2         |  |
| PPT1       | RAB3IL1      |  |
| PRKAR1A    | VPRBP        |  |
| PRKCA      | RUSC1-AS1    |  |
| PRKCA-AS1  | AEN          |  |
| PROKR1     | COLGALT1     |  |
| PROX1      | C4orf48      |  |

|           |          |  |
|-----------|----------|--|
| PROX1-AS1 | FADD     |  |
| PRRC2B    | ANKRD32  |  |
| PRTFDC1   | PELP1    |  |
| PRUNE2    | TOPBP1   |  |
| PTH1R     | PGPEP1   |  |
| PTHLH     | EXOSC6   |  |
| PTPN14    | HELZ     |  |
| PTPRK     | IDH2     |  |
| PTPRM     | PGP      |  |
| PTPRN2    | UBXN2B   |  |
| PXN-AS1   | SRRM1    |  |
| RAB27B    | ZFYVE28  |  |
| RAPGEF4   | ANLN     |  |
| RASD2     | MTBP     |  |
| RASGEF1C  | SUPT3H   |  |
| RBM24     | PLP2     |  |
| RBPM2     | EMILIN1  |  |
| RCAN1     | LIMK1    |  |
| REP15     | C19orf55 |  |
| REREP3    | PRRC2A   |  |
| RET       | RTP4     |  |
| RGS12     | DDB2     |  |
| RGS6      | EHBP1L1  |  |
| RIMS1     | RFX7     |  |
| RIPK2     | DNAJA1   |  |
| RMRP      | CABIN1   |  |
| RNF144A   | SRM      |  |
| RORA-AS2  | ICMT     |  |
| RPL13AP17 | FSTL3    |  |
| RPL13AP3  | SSH1     |  |
| RXFP2     | NCF2     |  |
| RYR1      | PAXIP1   |  |
| S100B     | RAC2     |  |
| SALL1     | E2F6     |  |
| SAP25     | MMS22L   |  |

|            |             |  |
|------------|-------------|--|
| SATB2-AS1  | ZKSCAN5     |  |
| SCARNA21   | TTI1        |  |
| SCARNA9L   | FLNA        |  |
| SCG3       | YEATS2      |  |
| SCOC       | AGAP3       |  |
| SCOC-AS1   | AP3M2       |  |
| SEMA3A     | AP2B1       |  |
| SEMA3E     | ITGA4       |  |
| SEPT10     | G6PC3       |  |
| SERPINE2   | AKT1        |  |
| SFTPB      | POGK        |  |
| SGSM1      | POLA1       |  |
| SH3RF3     | PSMB10      |  |
| SH3RF3-AS1 | NFATC2      |  |
| SHISA2     | PBDC1       |  |
| SIGLEC7    | TPP1        |  |
| SIT1       | ETFB        |  |
| SLC14A1    | SLC16A1-AS1 |  |
| SLC14A2    | MBD6        |  |
| SLC15A2    | DHX33       |  |
| SLC25A31   | C9orf41     |  |
| SLC26A11   | ALDH3B1     |  |
| SLC35D2    | LAP3        |  |
| SLC36A4    | RRP1B       |  |
| SLC9A4     | WNK1        |  |
| SLC9A9     | SIGMAR1     |  |
| SLC9A9-AS1 | DFFA        |  |
| SMAD1      | TRIM56      |  |
| SNORA38B   | IFI16       |  |
| SNORA75B   | MCTP2       |  |
| SNORD105   | MAPK1IP1L   |  |
| SNORD129   | DNAJC9      |  |
| SNORD151   | ZNF142      |  |
| SNORD154   | TGFB1       |  |
| SNORD62A   | MDM2        |  |



|           |              |  |
|-----------|--------------|--|
| SNORD62B  | FLVCR1       |  |
| SNORD82   | CTDNEP1      |  |
| SNX7      | APOBEC3C     |  |
| SORCS1    | TRAPPC1      |  |
| SOX10     | KPNA3        |  |
| SPATA46   | PLEK         |  |
| SPOCK3    | RP1-151F17.2 |  |
| ST18      | RAD54L2      |  |
| STOML3    | ABI2         |  |
| SV2B      | ANKRD28      |  |
| SYCP3     | SKAP1        |  |
| SYN2      | LINC00152    |  |
| SYT6      | BMP1         |  |
| SYT8      | RNF26        |  |
| TBC1D9B   | TOR2A        |  |
| TBX19     | HNRNPA2B1    |  |
| TCF4-AS1  | ZNF777       |  |
| TECRL     | CEP85        |  |
| TEDDM1    | TMCC1-AS1    |  |
| TEMN3-AS1 | B3GALT6      |  |
| TENM1     | CEP78        |  |
| TESC-AS1  | C4orf21      |  |
| TET2-AS1  | POMGNT2      |  |
| TEX13D    | SLC29A3      |  |
| TEX48     | POLR3D       |  |
| TEX53     | ODF2         |  |
| THBS1     | CCDC41       |  |
| TIMD4     | MLLT1        |  |
| TIMP4     | ATP2B4       |  |
| TLL2      | MT-CO3       |  |
| TMCO5A    | WIZ          |  |
| TMEFF2    | HNRNPUL1     |  |
| TMEM158   | FBF1         |  |
| TMEM176A  | EHMT2        |  |
| TMEM200A  | SNX27        |  |

|            |               |  |
|------------|---------------|--|
| TMEM211    | ARHGAP30      |  |
| TMEM244    | LRRC61        |  |
| TMEM26-AS1 | ADAR          |  |
| TMEM52B    | TCERG1        |  |
| TMEM72     | ZEB1-AS1      |  |
| TMIGD1     | NUP62         |  |
| TNFSF18    | TOMM5         |  |
| TNFSF9     | NEU3          |  |
| TNRC6C     | DCTD          |  |
| TPRG1      | PPP2R5E       |  |
| TPRG1-AS1  | SRGAP2        |  |
| TPRG1-AS2  | CEP57L1       |  |
| TUBB4A     | BTN3A2        |  |
| TUSC8      | ARL4C         |  |
| TXNDC16    | RP11-441O15.3 |  |
| UBE2E2-AS1 | LIPG          |  |
| UGGT2      | SNORA26       |  |
| UNQ6494    | CTSZ          |  |
| VCAM1      | DAB2IP        |  |
| VENTXP7    | PAM16         |  |
| VGLL3      | MT-ND1        |  |
| VIPR2      | ZBED6         |  |
| VIT        | FANCG         |  |
| VSTM2B     | LTV1          |  |
| WASHC2A    | FRMD5         |  |
| WDFY1      | MLEC          |  |
| WDR1       | CNTLN         |  |
| WNT2       | TCOF1         |  |
| WSCD2      | CBL           |  |
| XIRP1      | UBALD2        |  |
| ZBTB17     | CBX6          |  |
| ZFAT-AS1   | TAP1          |  |
| ZFP69B     | SPATA5        |  |
| ZFR2       | TADA3         |  |
| ZMYM4      | TMEM143       |  |

|             |              |  |
|-------------|--------------|--|
| ZNF385D     | CST3         |  |
| ZNF385D-AS1 | HNRNPA3      |  |
| ZNF385D-AS2 | CPVL         |  |
| ZNF407      | GBP3         |  |
| ZNF414      | ESF1         |  |
| ZNF518B     | PARVB        |  |
| ZNF595      | PIK3R3       |  |
| ZNF843      | AP5B1        |  |
| ZSWIM6      | HSP90AA1     |  |
| ZSWIM7      | HLA-A        |  |
|             | RP11-22B23.1 |  |
|             | KIAA1467     |  |
|             | FBXL6        |  |
|             | TBC1D2B      |  |
|             | PROSER1      |  |
|             | TMPO-AS1     |  |
|             | RBPJ         |  |
|             | APOBEC3D     |  |
|             | STARD4       |  |
|             | IFI35        |  |
|             | RIF1         |  |
|             | KNTC1        |  |
|             | SMC1A        |  |
|             | TAP2         |  |
|             | CENPP        |  |
|             | LGALS9       |  |
|             | PRR5L        |  |
|             | SNHG12       |  |
|             | DENND2D      |  |
|             | FAM111A      |  |
|             | GAR1         |  |
|             | RPRD2        |  |
|             | CTSD         |  |
|             | TMEM135      |  |
|             | AGTPBP1      |  |

|  |           |  |
|--|-----------|--|
|  | EPB41L3   |  |
|  | ARID3B    |  |
|  | RNPS1     |  |
|  | FYN       |  |
|  | NCOA6     |  |
|  | CNTROB    |  |
|  | AP2A2     |  |
|  | GALNT10   |  |
|  | MEF2D     |  |
|  | DPYSL2    |  |
|  | S100PBP   |  |
|  | TAF9B     |  |
|  | PDE4D     |  |
|  | DHX30     |  |
|  | RTF1      |  |
|  | PHTF1     |  |
|  | SLC35A4   |  |
|  | NMI       |  |
|  | RPL36A    |  |
|  | ST3GAL5   |  |
|  | HNRNPU    |  |
|  | C22orf46  |  |
|  | CTAGE5    |  |
|  | DARS2     |  |
|  | SNORA37   |  |
|  | AHSA1     |  |
|  | IL2RG     |  |
|  | CLEC10A   |  |
|  | POGZ      |  |
|  | BRICD5    |  |
|  | MIR3648   |  |
|  | RAB11FIP3 |  |
|  | FAM178A   |  |
|  | DCUN1D3   |  |
|  | ST3GAL1   |  |

|  |               |  |
|--|---------------|--|
|  | BTN2A3P       |  |
|  | KIAA0368      |  |
|  | SLC4A2        |  |
|  | ARSB          |  |
|  | OTUD7B        |  |
|  | SLC1A5        |  |
|  | TIPARP        |  |
|  | RP11-448A19.1 |  |
|  | DOT1L         |  |
|  | C2CD2L        |  |
|  | EXOSC9        |  |
|  | PML           |  |
|  | TPST2         |  |
|  | STX2          |  |
|  | SELPLG        |  |
|  | DPYD          |  |
|  | SOCS7         |  |
|  | UBAP2L        |  |
|  | PTPN9         |  |
|  | TTL           |  |
|  | ATXN2         |  |
|  | ARF3          |  |
|  | ADAT1         |  |
|  | KLHDC4        |  |
|  | AXIN1         |  |
|  | UHRF1BP1      |  |
|  | C5orf58       |  |
|  | FIGNL1        |  |
|  | SNTB2         |  |
|  | PUS1          |  |
|  | PSMA6         |  |
|  | REXO1         |  |
|  | IPO9          |  |
|  | DENND1A       |  |
|  | MACF1         |  |

|  |          |  |
|--|----------|--|
|  | SUV420H2 |  |
|  | BRI3     |  |
|  | WIPF1    |  |
|  | EXOC2    |  |
|  | MCOLN1   |  |
|  | PLB1     |  |
|  | MED1     |  |
|  | ARHGAP33 |  |
|  | FANCB    |  |
|  | ENDOD1   |  |
|  | UBFD1    |  |
|  | MPHOSPH9 |  |
|  | TET3     |  |
|  | APOBEC3F |  |
|  | NASP     |  |
|  | NTNG2    |  |
|  | TAGLN2   |  |
|  | ZCCHC2   |  |
|  | IDS      |  |
|  | CECR1    |  |
|  | AGPAT3   |  |
|  | PCNT     |  |
|  | BRE      |  |
|  | ACP2     |  |
|  | SYNJ1    |  |
|  | WDR90    |  |
|  | HIPK1    |  |
|  | HSF4     |  |
|  | MB21D1   |  |
|  | KLF16    |  |
|  | TRIM21   |  |
|  | ADCY7    |  |
|  | ZNF384   |  |
|  | LARS2    |  |
|  | PLEKHO2  |  |

|  |             |  |
|--|-------------|--|
|  | FNBP1P1     |  |
|  | CAMTA2      |  |
|  | TAF4        |  |
|  | SLC25A44    |  |
|  | PLEKHB2     |  |
|  | HLA-B       |  |
|  | PTP4A1      |  |
|  | SEMA4D      |  |
|  | HEATR3      |  |
|  | ABL2        |  |
|  | AC073046.25 |  |
|  | ANKRD52     |  |
|  | ATIC        |  |
|  | PRRC2C      |  |
|  | TBC1D10B    |  |
|  | TFEC        |  |
|  | AOAH        |  |
|  | ZNF746      |  |
|  | DECR2       |  |
|  | SIK3        |  |
|  | ASCC3       |  |
|  | CHKA        |  |
|  | SRCAP       |  |
|  | SRGAP2B     |  |
|  | RASL12      |  |
|  | TOR1A       |  |
|  | SNX18       |  |
|  | PARP9       |  |
|  | SETD1A      |  |
|  | FAM89B      |  |
|  | HYOU1       |  |
|  | SLC19A2     |  |
|  | CALR        |  |
|  | TMSB15B     |  |
|  | FAM120A     |  |

|  |              |  |
|--|--------------|--|
|  | FAM211A      |  |
|  | TEX261       |  |
|  | FAM50A       |  |
|  | CD247        |  |
|  | NUP214       |  |
|  | VPS26B       |  |
|  | C17orf89     |  |
|  | KIAA0895L    |  |
|  | ACSL4        |  |
|  | AP1S2        |  |
|  | TRIM11       |  |
|  | ITSN1        |  |
|  | TTLL4        |  |
|  | MGRN1        |  |
|  | RHBDD3       |  |
|  | GPRIN1       |  |
|  | CYBB         |  |
|  | SAP130       |  |
|  | BRD8         |  |
|  | FAM193A      |  |
|  | HUWE1        |  |
|  | RP11-571M6.8 |  |
|  | ANP32B       |  |
|  | FKBP15       |  |
|  | R3HDM1       |  |
|  | SLC25A37     |  |
|  | NUPL1        |  |
|  | PTPN12       |  |
|  | NCOA5        |  |
|  | PARP4        |  |
|  | GALC         |  |
|  | IL10RA       |  |
|  | ANAPC1       |  |
|  | GDI1         |  |
|  | EIF4G3       |  |



|  |          |  |
|--|----------|--|
|  | ZC3H4    |  |
|  | NUP188   |  |
|  | OPA3     |  |
|  | ETV5     |  |
|  | CD99L2   |  |
|  | SPATA20  |  |
|  | DPY19L1  |  |
|  | INPPL1   |  |
|  | CYTH4    |  |
|  | EIF4EBP2 |  |
|  | ELF4     |  |
|  | ZBED4    |  |

**Supplemental Table S5. shRNA screening identifies shared downregulated, upregulated genes affected by TOX2-shRNA1 and TOX2-shRNA2 in NKYS cell.**

| <b>shTOX2 vs shScr<br/>(Downregulation)</b> | <b>shTOX2 vs shScr<br/>(Upregulation)</b> |
|---------------------------------------------|-------------------------------------------|
| LIMCH1                                      | IGF1                                      |
| ZP2                                         | ARHGAP31                                  |
| DPYSL3                                      | IFT27                                     |
| TOX2                                        | KLHL4                                     |
| FCRLA                                       | HAGHL                                     |
| LGR6                                        | CHPT1                                     |
| FBLN2                                       | MDN1                                      |
| KRT80                                       | KYNU                                      |
| SCARA5                                      | ELOVL4                                    |
| CDH4                                        | CMPK2                                     |
| PRR5                                        | CYP4V2                                    |
| MICA                                        | LHFPL2                                    |
| HLA-DPB1                                    | PSPH                                      |
| ARL14EPL                                    | CD226                                     |
| AC130304.1                                  | SLC7A11                                   |
| TFAP2B                                      | PDE3B                                     |
| ATP12A                                      | ANKRD22                                   |
| LGALS3BP                                    | CCR5                                      |
| MDGA1                                       | CCDC78                                    |
| KLHL24                                      | TRAT1                                     |
| SLAMF1                                      | TIGD6                                     |
| KRT7                                        | GAS1                                      |
| CCNG2                                       | MB21D2                                    |
| DMP1                                        | PMCH                                      |
| IP6K3                                       | TPRG1                                     |
| PRKCE                                       | SELL                                      |
| ACBD7                                       | TCF4                                      |
| ALOX12B                                     | CARD11                                    |
| GJD3                                        | F5                                        |
| H2AC18                                      | VIT                                       |
| CFI                                         | ADGRG1                                    |
| CCDC13                                      | SLC12A8                                   |
| CALCOCO1                                    | SOX2-OT                                   |
| DPEP1                                       | AC005831.1                                |
| ERO1B                                       | AC244258.1                                |
| NDRG1                                       | ABBA01000935.2                            |
| LILRB1                                      | NEFH                                      |
| STAG3L4                                     | APOBEC3H                                  |
| RASSF4                                      | SASH1                                     |
| CILK1                                       | COX7A2                                    |

|           |           |
|-----------|-----------|
| SPP1      | IL10      |
| YPEL5     | LINC00467 |
| CD244     | FBN1      |
| SERPINB6  | ZNF239    |
| PIMREG    | SVIL      |
| KLC4      | SNX18P3   |
| SULF1     | TNC       |
| GABARAPL1 | TIE1      |
| ITGB7     | RASSF2    |
| CGN       | RIC8B     |
| TBC1D7    | IL18RAP   |
| STC1      | AOAH      |
| ISG20     | ELAC1     |
| STARD5    | MYO1F     |
| YPEL2     | RGS18     |
| PTP4A3    | AUTS2     |
| IFITM1    | CYB5A     |
| SNHG32    | KATNAL2   |
| HLA-C     | MYO5B     |
| HLA-F     | TLR6      |
| HCP5      | GPC6      |
| HLA-A     | EVI2B     |
| HCG11     | ZSCAN30   |
| HLA-B     | LINC00638 |
| FRG2EP    | RMRP      |
|           | RPPH1     |

**Supplemental Table S6. TOX2 binding on 12 genes out of 65 genes downregulated by TOX-shRNA.**

| <b>Gene</b> | <b>Number of ChIP-seq binding site</b> | <b>Binding region</b>                 |
|-------------|----------------------------------------|---------------------------------------|
| LIMCH1      | 5                                      | intron (NM_001289122, intron 2 of 25) |
|             |                                        | <b>promoter-TSS (NM_001289124)</b>    |
|             |                                        | intron (NM_001289122, intron 1 of 25) |
|             |                                        | Intergenic                            |
|             |                                        | intron (NM_001289122, intron 1 of 25) |
| ZP2         | 1                                      | intron (NM_003460, intron 10 of 19)   |
| DPYSL3      | 4                                      | intron (NM_001197294, intron 1 of 13) |
|             |                                        | 3'-UTR (NM_001287740, exon 14 of 14)  |
|             |                                        | intron (NM_001197294, intron 1 of 13) |
|             |                                        | Intergenic                            |
| TOX2        | 2                                      | intron (NM_001098797, intron 3 of 8)  |
|             |                                        | intron (NM_001098797, intron 3 of 8)  |
| FBLN2       | 1                                      | intron (NM_001004019, intron 2 of 17) |
| KRT80       | 2                                      | intron (NM_182507, intron 2 of 8)     |
|             |                                        | Intergenic                            |
| TFAP2B      | 2                                      | Intergenic                            |
|             |                                        | Intergenic                            |
| PRKCE       | 2                                      | intron (NM_005400, intron 1 of 14)    |
|             |                                        | intron (NM_005400, intron 1 of 14)    |
| GJD3        | 1                                      | intron (NM_001024809, intron 6 of 7)  |
| NDRG1       | 1                                      | intron (NM_001258432, intron 1 of 13) |
| YPEL2       | 1                                      | Intergenic                            |
| PTP4A3      | 1                                      | <b>promoter-TSS (NM_032611)</b>       |

**Supplemental Table S7. Identification of TOX2 binding motif (^VSSSGVVGCG) in PTP4A3 promoter.**

| Motif_alt_id | Sequence_name                   | Start* | Stop* | Ccore   | p-value  | q-value | Matched_sequence |
|--------------|---------------------------------|--------|-------|---------|----------|---------|------------------|
| VSSSGVVGCG   | PTP4A3_chr8:141390021-141394021 | -113   | -104  | 12.9515 | 2.17E-05 | 0.0252  | GGGGGCGGCG       |
| VSSSGVVGCG   | PTP4A3_chr8:141390021-141394021 | -107   | -98   | 12.9515 | 2.17E-05 | 0.0252  | GGCGGGCGCG       |
| VSSSGVVGCG   | PTP4A3_chr8:141390021-141394021 | -99    | -90   | 12.9515 | 2.17E-05 | 0.0252  | CGCGGCCGCG       |
| VSSSGVVGCG   | PTP4A3_chr8:141390021-141394021 | -96    | -87   | 12.9515 | 2.17E-05 | 0.0252  | GGCCGCGGCG       |
| VSSSGVVGCG   | PTP4A3_chr8:141390021-141394021 | -13    | -14   | 12.9515 | 2.17E-05 | 0.0252  | CGCGGCCGCG       |
| VSSSGVVGCG   | PTP4A3_chr8:141390021-141394021 | +90    | +99   | 12.9515 | 2.17E-05 | 0.0252  | GGCGGGGGCG       |
| VSSSGVVGCG   | PTP4A3_chr8:141390021-141394021 | +92    | +101  | 12.9515 | 2.17E-05 | 0.0252  | CGGGGGCGCG       |
| VSSSGVVGCG   | PTP4A3_chr8:141390021-141394021 | +97    | +106  | 12.9515 | 2.17E-05 | 0.0252  | GCGCGCGGCG       |

^ IUPAC notation: V for C/G/T; S for C/G

Start\* to Stop\*: position relative to transcription start site (TSS)

**Supplemental Table S8. RUNX3 binding motifs on TOX2-SE and their ChIP-PCR primers.**

| RUNX3 binding site | Motif position          | Primer sequences                                                        |
|--------------------|-------------------------|-------------------------------------------------------------------------|
| E1                 | chr20:42568538-42568545 | F1: 5'- TGCCTGGCACAGAGTAGATG -3'<br>R1: 5'- GCATGACTCCCTGCCCTTTA -3'    |
| E2                 | chr20:42579003-42579010 | F2: 5'- GAGGTTCTCGGATGTGCTG -3'<br>R2: 5'- CCCAGAAAGAGGAAGCCAG -3'      |
| E3                 | chr20:42588335-42588342 | F3: 5'- TCATTGTCTCAGTCACACTCGT -3'<br>R3: 5'- TAACTAAAAGCCGCATGAGCG -3' |

**Supplemental Table S9. Clinical features of 42 cases of NKTL and their expression of TOX2, RUNX3 and PRL-3 in CD3+ NKTL tumor cells.**

| UPN   | Age (y) | sex M=1<br>F=0 | Ethnicity | Diagnosis       | % of<br>CD3+<br>cells | Average<br>of OPN<br>Mean<br>Intensity | Average<br>of PRL-3<br>Mean<br>Intensity | Average<br>of<br>RUNX3<br>Mean<br>Intensity | Average<br>of TOX2<br>Mean<br>Intensity | Over<br>survival<br>(months) | therapeutic Regime  |
|-------|---------|----------------|-----------|-----------------|-----------------------|----------------------------------------|------------------------------------------|---------------------------------------------|-----------------------------------------|------------------------------|---------------------|
| UPN1  | 65      | 1              | Chinese   | extranodal NKTL | 90.61%                | 7.394284                               | 3.002738                                 | 37.26697                                    | 1.466337                                | 4.13                         | CHOP + RT           |
| UPN2  | 33      | NA             | NA        | extranodal NKTL | 80.98%                | 7.327955                               | 2.5666                                   | 28.23033                                    | 0.930459                                | NA                           | NA                  |
| UPN3  | 45      | 1              | Chinese   | extranodal NKTL | 68.17%                | 6.194917                               | 1.067165                                 | 23.89497                                    | 0.222303                                | 263.4                        | CHOP + RT           |
| UPN4  | 69      | 1              | Chinese   | extranodal NKTL | 46.92%                | 5.093111                               | 0.874702                                 | 28.39717                                    | 0.147577                                | NA                           | NA                  |
| UPN5  | 46      | 1              | Chinese   | extranodal NKTL | 63.82%                | 3.369431                               | 0.879413                                 | 21.40294                                    | 0.308685                                | 4.57                         | CHOP                |
| UPN6  | 51      | 1              | Chinese   | extranodal NKTL | 72.64%                | 8.596648                               | 1.202651                                 | 30.31302                                    | 0.177647                                | 6.6                          | SMILE               |
| UPN7  | 82      | 1              | Chinese   | extranodal NKTL | 59.97%                | 5.002496                               | 1.360308                                 | 14.65681                                    | 0.002767                                | NA                           | NA                  |
| UPN8  | 17      | 1              | Chinese   | extranodal NKTL | 71.90%                | 5.496517                               | 0.945192                                 | 32.5889                                     | 0.157369                                | 3.53                         | FLU                 |
| UPN9  | 47      | 1              | Chinese   | extranodal NKTL | 35.15%                | 3.899534                               | 0.60208                                  | 23.86307                                    | 0.148119                                | 7.9                          | CHOP --> DHAP       |
| UPN10 | 32      | 1              | Malay     | extranodal NKTL | 61.52%                | 4.715732                               | 1.149132                                 | 19.63255                                    | 0.203751                                | NA                           | NA                  |
| UPN11 | 46      | 0              | Chinese   | extranodal NKTL | 52.46%                | 4.511232                               | 0.599461                                 | 11.3639                                     | 0.03694                                 | NA                           | NA                  |
| UPN12 | 52      | 1              | Chinese   | extranodal NKTL | 61.47%                | 5.565914                               | 1.188073                                 | 20.03456                                    | 0.178141                                | NA                           | NA                  |
| UPN13 | 62      | 1              | Chinese   | extranodal NKTL | 59.48%                | 5.389707                               | 1.110743                                 | 21.70389                                    | 0.202325                                | 3.57                         | RT                  |
| UPN14 | 56      | 1              | Chinese   | extranodal NKTL | 60.01%                | 4.775464                               | 1.369269                                 | 24.40323                                    | 0.229999                                | NA                           | NA                  |
| UPN15 | 29      | 0              | Indonsian | extranodal NKTL | 32.46%                | 6.963221                               | 0.548787                                 | 22.77629                                    | 0.078642                                | 44.8                         | RT                  |
| UPN16 | 26      | 1              | Chinese   | extranodal NKTL | 59.09%                | 6.226929                               | 0.975057                                 | 28.95109                                    | 0.630805                                | 0.53                         | NA                  |
| UPN17 | 32      | 1              | Chinese   | extranodal NKTL | 58.77%                | 9.396764                               | 1.222021                                 | 25.91712                                    | 0.192903                                | 62.7                         | ICE + RT            |
| UPN18 | 37      | 1              | Chinese   | extranodal NKTL | 43.17%                | 6.157622                               | 0.619345                                 | 18.43302                                    | 0.082614                                | 37.07                        | GIFOX-B + RT        |
| UPN19 | 52      | 1              | Pakistani | extranodal NKTL | 72.45%                | 7.191923                               | 1.01087                                  | 22.97384                                    | 0.125467                                | 4.63                         | RT                  |
| UPN20 | 58      | 0              | Chinese   | extranodal NKTL | 58.43%                | 4.642634                               | 1.598177                                 | 22.24805                                    | 0.333798                                | 25.87                        | SMILE + BMT         |
| UPN21 | 55      | 1              | Chinese   | extranodal NKTL | 35.15%                | 4.561414                               | 0.949125                                 | 26.82183                                    | 0.308786                                | 11.2                         | ICE + RT            |
| UPN22 | 65      | 1              | Chinese   | extranodal NKTL | 48.78%                | 5.569317                               | 1.838015                                 | 26.80178                                    | 0.105642                                | 2.23                         | m-BACOD             |
| UPN23 | 60      | 0              | Chinese   | extranodal NKTL | 55.72%                | 9.541487                               | 1.153713                                 | 27.31641                                    | 0.251937                                | 5.87                         | GIFOX-B             |
| UPN24 | 65      | 1              | Malay     | extranodal NKTL | 68.81%                | 6.659114                               | 1.106123                                 | 25.54481                                    | 0.740558                                | 0.4                          | NA                  |
| UPN25 | 40      | 1              | chinese   | extranodal NKTL | 59.28%                | 4.563301                               | 1.513984                                 | 20.42494                                    | 0.387156                                | 0.4                          | NA                  |
| UPN26 | 39      | 0              | Chinese   | extranodal NKTL | 48.95%                | 5.474348                               | 1.01763                                  | 21.58534                                    | 0.195355                                | 82.87                        | SMILE + RT          |
| UPN27 | 68      | 0              | Chinese   | extranodal NKTL | 60.16%                | 5.742883                               | 0.628603                                 | 18.14864                                    | 0.12567                                 | 1.33                         | L-ASP, ETP          |
| UPN28 | 65      | 0              | Chinese   | extranodal NKTL | 57.38%                | 6.469747                               | 1.290395                                 | 25.64853                                    | 0.229245                                | 78.77                        | SMILE + RT          |
| UPN29 | 51      | 0              | NA        | extranodal NKTL | 69.87%                | 9.456637                               | 0.79612                                  | 27.03723                                    | 0.16775                                 | NA                           | NA                  |
| UPN30 | 54      | 1              | Chinese   | extranodal NKTL | 72.50%                | 4.896238                               | 0.850453                                 | 23.95717                                    | 0.24257                                 | 146.47                       | SMILE + BMT         |
| UPN31 | 69      | 0              | Chinese   | extranodal NKTL | 58.19%                | 4.030339                               | 0.931664                                 | 26.1669                                     | 0.879483                                | 0.007                        | VCR + PSL + HCT     |
| UPN32 | 70      | 0              | Chinese   | extranodal NKTL | 56.08%                | 4.963332                               | 1.326705                                 | 24.61369                                    | 0.178749                                | 1.83                         | CT (others)         |
| UPN33 | 61      | 1              | Chinese   | extranodal NKTL | 55.02%                | 3.693718                               | 0.795721                                 | 22.2676                                     | 0.183336                                | 61.3                         | SMILE + RT          |
| UPN34 | 53      | 1              | NA        | extranodal NKTL | 74.38%                | 5.565899                               | 1.098456                                 | 27.9402                                     | 0.060667                                | NA                           | NA                  |
| UPN35 | 61      | 1              | Chinese   | extranodal NKTL | 57.84%                | 6.048051                               | 1.37289                                  | 28.06425                                    | 0.35535                                 | 55.4                         | ICE + RT            |
| UPN36 | 30      | 1              | Chinese   | extranodal NKTL | 62.83%                | 5.550599                               | 1.006421                                 | 29.12791                                    | 0.417022                                | 14.63                        | SMILE               |
| UPN37 | 54      | 1              | Chinese   | extranodal NKTL | 62.90%                | 6.121998                               | 0.803613                                 | 24.22935                                    | 0.233414                                | 47.73                        | SMILE + RT          |
| UPN38 | 61      | 0              | NA        | extranodal NKTL | 57.65%                | 4.703871                               | 1.06399                                  | 29.87056                                    | 0.50706                                 | 23.5                         | SMILE+Pembrolizumab |
| UPN39 | 37      | 0              | Chinese   | extranodal NKTL | 59.89%                | 5.002218                               | 0.584317                                 | 30.39401                                    | 0.218481                                | NA                           | SMILE + RT          |
| UPN40 | 43      | 1              | Chinese   | extranodal NKTL | 57.12%                | 4.991527                               | 0.699007                                 | 28.887                                      | 0.189985                                | NA                           | NA                  |
| UPN41 | 60      | 1              | Chinese   | extranodal NKTL | 87.00%                | 6.773904                               | 0.507205                                 | 30.66179                                    | 0.147808                                | 6.87                         | LVP + RT            |
| UPN42 | 69      | 1              | Malay     | extranodal NKTL | 70.59%                | 3.817556                               | 0.881828                                 | 23.60274                                    | 0.38975                                 | NA                           | NA                  |

**Abbreviations:**

UPN: unique patient number

NA: information not available

LVP: L-asparaginase, vincristine, and prednisone

L-ASP: L-asparaginase

ETP: etoposide

FLU: fludarabine

VCR: vincristine

PSL: prednisolone

HCT: hydrocortisone:

CHOP: cyclophosphamide, doxorubicin (hydroxydaunomycin), vincristine (oncovin), and prednisolone

DHAP: dexamethasone, cisplatin, cytarabine

SMILE: dexamethasone, methotrexate, ifosfamide, L-asparaginase, and etoposide

GIFOX-B: gemcitabine, ifosfamide, oxaliplatin, and bortezomib

m-BACOD: methotrexate, bleomycin, doxorubicin (adriamycin), cyclophosphamide, vincristine, and dexamethasone

ICE: ifosfamide, carboplatin, and etoposide

CT: chemotherapy

RT: radiation therapy

## Supplemental figures

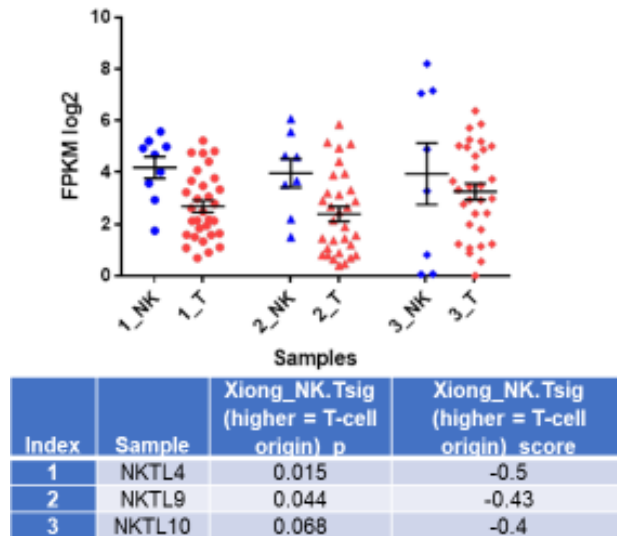

**Figure S1. Determination of cell-origin of 3 NKTL cases on their RNA-seq data.** This analysis was performed by using a two-sample Kolmogorov-Smirnov based method developed in house and the NK cell and T cell signature published by Xiong J, et al (Cancer Cell. 2020 Mar 16;37(3):403-419). This dot plot shows the genes expression of NK-origin (blue) and T-cells-origin (red). Lowly expressed genes (mean FPKM < 1) has been filtered out.



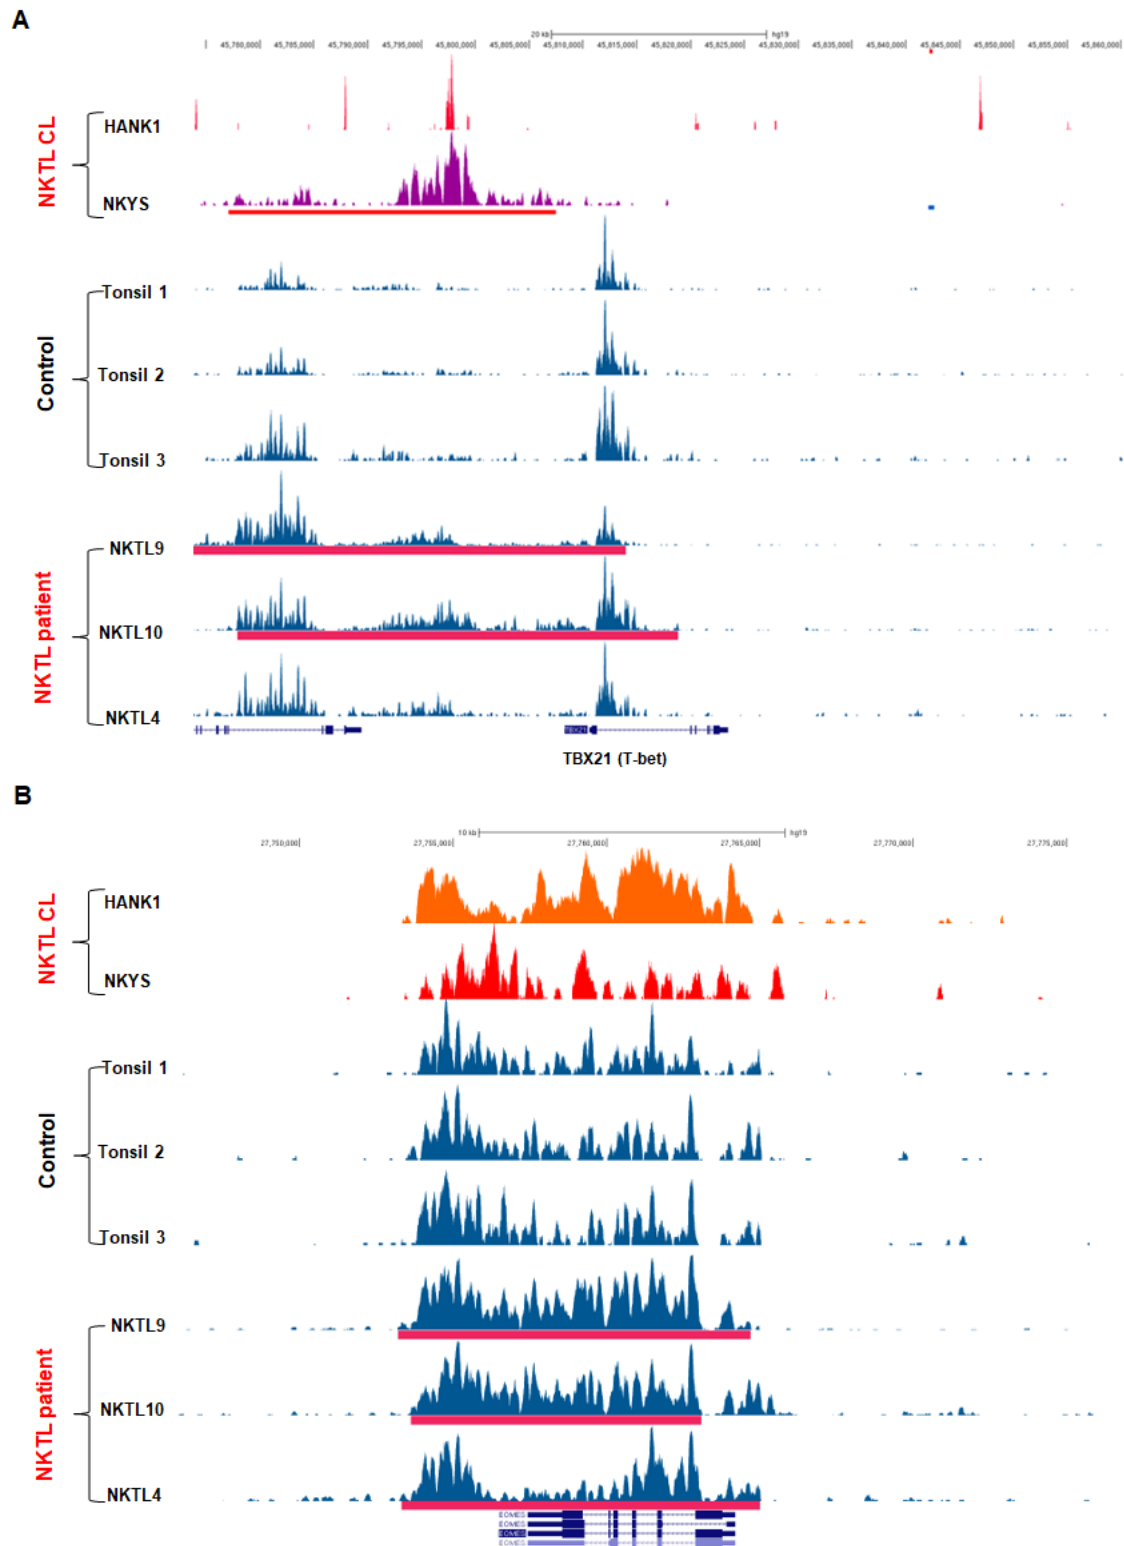

**Figure S2. UCSC Genome Browser ChIP-Seq screenshot.** Track view of H3K27ac ChIP-seq density profile centered at the TBX21 (T-bet) and EOMES gene loci of NKTL cell line HNAK1 and NKYS (top panel), 3 tonsil controls (middle panel) and 3 primary NKTL patient samples (lower panel). Locations of the SEs regions were marked by red bars.



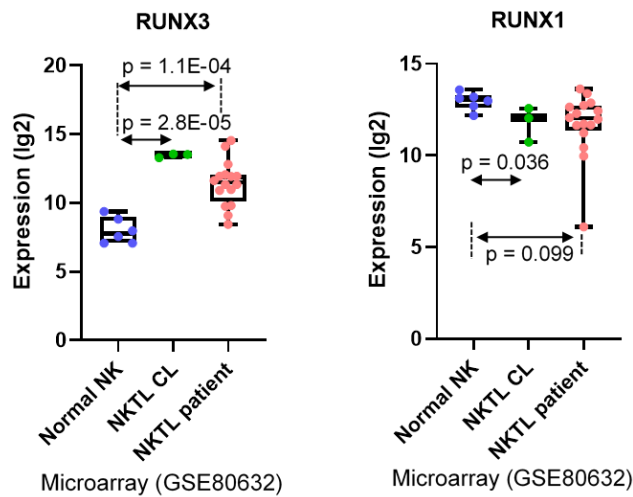

**Figure S4. The expression of RUNX1 and RUNX3 in normal NK cells, NKTL cell lines and NKTL patient samples.** Expression (lg2) level of RUNX1 and RUNX3 in a collection of normal NK cells, NKTL cell line and NKTL patient samples derived from a microarray dataset in Gene Expression Omnibus (GEO) database (accession number: GSE80632). p value < 0.05 is considered as statistically significant.

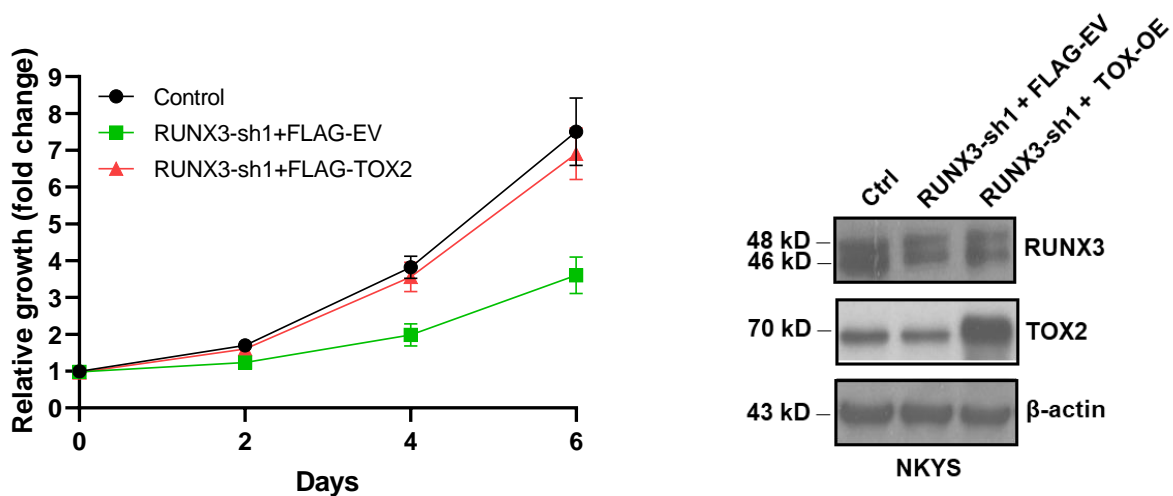

**Figure S5. TOX2 overexpression rescues NKYS cells from RUNX3 depletion.** (A) Comparison of the rate of growth of co-transduced NKYS cells expressing FLAG-EV (empty vector) or FLAG-TOX2 and RUNX3-sh1 constructs. NKYS cells co-transduced with FLAG-EV and scramble shRNA were used as control. For each condition, cell number was counted at day 2, 4, and 6, then converted to fold change relative to the starting number at day 0. Same number of cells were seeded at day 0 and comparison was made at indicated days for relative fold changes. Three biologically independent experiments were performed (mean  $\pm$  SD). Western blot analysis showing the expression of RUNX3 and TOX2 shown on the right.  $\beta$ -actin was used as the loading control.
